# Supplementary material for: Rice cellulose synthase-like protein OsCSLD4 coordinates the trade-off between plant growth and defense
Source: Front Plant Sci. 2022 Sep 26;13:980424. doi: 10.3389/fpls.2022.980424 (PMC9548992; doi:10.3389/fpls.2022.980424)
Supplement: Supplementary file 2 [file Table_1.xlsx]

## Sheet: Sheet1
Supplementary Table 3. Differentially expressed genes (DEGs) in WT and dnl19 mutant.
Gene ID	WT Avg. FPKM	dnl19 Avg. FPKM	Log2 (dnl19/ WT)	Q value (dnl19/ WT)
Os01g0106400	1.71667	7.335	1.97305	0.00027515
Os01g0110200	0.06	5.865	6.53785	1.6659e-06
Os01g0117450	0.71	0.085	-3.19539	0.0203479
Os01g0117900	4.71667	37.21	2.84321	4.71408e-42
Os01g0119100	0.146667	1.09	2.72192	0.0182594
Os01g0124700	0.506667	7.74	3.8272	5.25262e-06
Os01g0128200	2.47333	6.905	1.34275	0.0135961
Os01g0132000	8.24667	228.34	4.65198	1.1284e-13
Os01g0135700	2.91	10.005	1.65267	0.00434554
Os01g0152000	0.0266667	0.665	4.39053	0.000535486
Os01g0159200	0.0433333	5.29	6.73076	7.19042e-05
Os01g0160100	1.39667	3.82	1.322	0.0312292
Os01g0164800	2.07667	5.245	1.20237	0.00893543
Os01g0168100	11.7467	27.51	1.02511	0.00915362
Os01g0170000	1.26667	3.615	1.40926	0.0470715
Os01g0172800	2.75333	8.175	1.43017	0.0186883
Os01g0175700	20.6333	10.225	-1.16083	1.06809e-06
Os01g0179600	9.66667	3.99	-1.41289	0.0014854
Os01g0179800	58.6033	28.22	-1.19642	1.86289e-05
Os01g0185300	5.87333	23.175	1.80213	2.61465e-09
Os01g0195400	0.04	1.495	5.08559	0.00670386
Os01g0197700	0.0633333	1.275	4.15078	0.00114988
Os01g0209500	1.66	0.485	-1.92978	0.000123444
Os01g0214600	0.666667	5.64	2.93524	0.000940653
Os01g0218500	3.06	0.395	-2.97172	6.08028e-06
Os01g0221600	26.5933	14.385	-1.02272	0.00134007
Os01g0224100	4.23333	2.315	-1.04495	0.017804
Os01g0236300	4.35333	2.345	-1.02741	0.0057275
Os01g0242900	5.45	13.885	1.23108	0.0156382
Os01g0249200	0.523333	8.445	3.86948	3.89701e-08
Os01g0265100	0.196667	3.165	3.87555	0.0026375
Os01g0270300	2.09667	7.445	1.69863	0.000904237
Os01g0275950	13.7567	6.48	-1.22178	0.000185287
Os01g0282800	1.21667	9.41	2.81059	5.61031e-11
Os01g0290700	4.15	10.18	1.18528	0.0478096
Os01g0291500	0	0.8	6.41008	0.00266291
Os01g0294700	0.736667	5.66	2.80667	3.63994e-05
Os01g0348900	0.0466667	2.35	5.35238	0.0317057
Os01g0351800	0.416667	1.77	1.94701	0.0259108
Os01g0352100	2.21	9.485	1.9622	1.27177e-08
Os01g0357200	0.88	7.72	2.98684	0.00376812
Os01g0369900	11.13	5.935	-1.04668	2.5663e-05
Os01g0389700	24	68.56	1.38271	1.5653e-07
Os01g0504500	1.60333	4.265	1.24581	0.00346427
Os01g0511100	4.97667	12.475	1.191	0.000514189
Os01g0524400	4.04667	1.575	-1.49498	0.00623404
Os01g0532700	3.24667	1.535	-1.21851	0.00295641
Os01g0534900	11.1967	30.165	1.29246	5.92984e-08
Os01g0537250	6.72333	106.775	3.85609	6.44771e-106
Os01g0541800	0.72	2.79	1.8147	0.013941
Os01g0571100	7.28	18.035	1.18889	0.0166366
Os01g0575200	0.526667	1.88	1.70153	0.0166043
Os01g0584900	0.73	3.99	2.29783	0.00906817
Os01g0597600	0	0.815	6.37817	0.00189788
Os01g0602400	2.13	6.085	1.36328	0.00400821
Os01g0605100	0.33	1.83	2.38892	0.00815382
Os01g0610800	2.19	9.42	1.97748	0.00836593
Os01g0611000	0.09	1.66	4.10608	0.000234256
Os01g0612500	0.256667	2.855	3.31379	0.00075735
Os01g0613800	1.24333	4.075	1.56086	0.0375241
Os01g0618900	7.07333	16.27	1.01585	0.000614483
Os01g0622400	4.46333	0.155	-5.9156	0.0142806
Os01g0625200	0.626667	2.32	1.71712	0.0401731
Os01g0627800	0.95	2.815	1.42599	0.0186305
Os01g0627900	0.0433333	0.96	4.29307	0.0045367
Os01g0628900	0.236667	2.45	3.26603	9.47314e-06
Os01g0633100	2.23333	0.75	-1.71652	0.00145748
Os01g0643300	0.433333	1.525	1.70986	0.00893543
Os01g0647000	6.44333	3	-1.11909	0.0111452
Os01g0654450	13.14	5.185	-1.52127	0.0297439
Os01g0660200	4.00667	21.145	2.25208	2.5103e-05
Os01g0672600	0	53.21	8.70341	1.62759e-09
Os01g0687400	2.29667	6.285	1.30096	0.0422532
Os01g0692400	0.0666667	7.46	6.6473	6.4329e-07
Os01g0695800	1.77667	16.825	3.1056	3.8986e-16
Os01g0699500	0	0.77	6.08771	0.00896846
Os01g0699600	0	0.53	5.7471	0.0214866
Os01g0713200	9.00667	55.985	2.47873	0.0486633
Os01g0713600	0.05	1.31	4.56721	0.00275959
Os01g0727800	6.25	3.285	-1.0716	0.0188561
Os01g0742400	0.68	2.08	1.46093	0.00191631
Os01g0750000	1.18333	3.6	1.54517	0.0254329
Os01g0750300	0.313333	8.295	4.19016	6.48865e-12
Os01g0752200	8.12667	17.975	1.00577	4.80239e-05
Os01g0757200	2.56333	31.765	3.50349	1.35516e-05
Os01g0759400	7.44333	3.425	-1.25795	2.01084e-08
Os01g0763200	6.71	3.55	-1.04974	0.0325839
Os01g0773100	2.9	7.05	1.11082	0.000349378
Os01g0777900	2.72333	14.085	2.25211	0.000322439
Os01g0778800	2.09	5.555	1.26467	0.00143137
Os01g0787000	0.433333	1.72	1.85477	0.0211871
Os01g0795200	0.56	7.275	3.53101	7.96598e-08
Os01g0795250	0.0333333	0.745	4.85205	0.0376818
Os01g0795400	0.17	1.255	2.87245	0.00326203
Os01g0800500	10.2233	5.14	-1.13783	0.00389448
Os01g0804200	0.946667	2.58	1.31343	0.0403045
Os01g0805900	7.61333	26.595	1.66975	6.88398e-06
Os01g0816100	0.22	2.945	3.61247	2.70599e-05
Os01g0823100	0.0966667	1.28	3.64007	0.0263838
Os01g0824800	1.02	3.19	1.50485	0.0135011
Os01g0825800	2.13333	5.99	1.36335	0.00109328
Os01g0837000	6.29333	18.46	1.40199	4.39754e-05
Os01g0841700	0.823333	5.88	2.70166	0.00193272
Os01g0842500	0.03	1.545	5.49612	8.10725e-06
Os01g0844300	1.22	4.67	1.79716	0.000401132
Os01g0848700	3.67667	8.225	1.01759	0.0199935
Os01g0850700	4.94333	2.255	-1.26654	0.000158055
Os01g0852800	4.7	0.88	-2.63996	0.0269081
Os01g0864500	0.893333	4.84	2.30633	0.00358934
Os01g0869200	11.8667	6.335	-1.04284	9.41165e-06
Os01g0869750	4.7	0.88	-2.63996	0.0269081
Os01g0875700	1.17333	3.58	1.46777	0.0385389
Os01g0876800	4.70667	13.215	1.34816	4.40789e-05
Os01g0883000	2.08667	1.1	-1.0671	0.0366222
Os01g0883900	1.76667	5.11	1.39497	9.08485e-05
Os01g0893400	102.743	53.755	-1.08283	7.96873e-12
Os01g0905200	1.71	6.575	1.83453	3.46374e-06
Os01g0919400	9.62667	5.045	-1.07596	3.42662e-08
Os01g0926600	3.11667	11.52	1.74464	2.95794e-05
Os01g0926700	1.93	6.15	1.52795	0.0173021
Os01g0936600	4.71	13.73	1.41494	0.0104761
Os01g0940800	0.266667	1.625	2.45572	0.0301489
Os01g0951500	2.56	1.315	-1.10678	0.0431054
Os01g0953600	23.3933	51.93	1.01243	1.10646e-06
Os01g0955100	1.13333	8.86	2.85019	0.000523088
Os01g0962700	4.44333	21.51	2.1339	3.81571e-11
Os01g0963000	1.54333	7.02	2.06819	9.28745e-05
Os01g0969100	1.82333	6.285	1.64947	9.71638e-06
Os01g0971500	11.3267	26.1	1.06557	0.00350187
Os02g0102300	4.15333	19.395	2.09145	0.00101731
Os02g0104100	0.0733333	1.805	4.46935	0.0287424
Os02g0111600	1.98	6.15	1.50125	0.00543713
Os02g0114200	3.31667	8.96	1.17041	0.017602
Os02g0115700	496.287	1014	1.0069	9.60092e-06
Os02g0121700	0.0233333	0.59	4.57634	0.0229046
Os02g0126000	5.13333	2.495	-1.18484	2.74219e-05
Os02g0126400	11.6133	26.61	1.05196	8.25888e-06
Os02g0129800	29.87	80.58	1.30311	0.0150054
Os02g0142800	5.83333	2.995	-1.11441	0.00135282
Os02g0164000	0.12	0.7	2.37169	0.0425185
Os02g0166200	42.7633	23.49	-1.00676	3.46426e-06
Os02g0167300	5.1	11.725	1.00549	0.00781575
Os02g0173200	2.10333	9.675	2.06426	4.28626e-08
Os02g0177600	6.71667	22	1.57859	3.78408e-08
Os02g0181300	1.32	5.39	1.88189	0.000195271
Os02g0192500	0.393333	2.705	2.50471	0.0390884
Os02g0197700	3.44333	1.7	-1.15549	0.0335916
Os02g0208500	2.72333	19.295	2.68821	2.27446e-08
Os02g0213450	5.57667	1.205	-2.32984	0.014062
Os02g0223850	2.30333	1.175	-1.10223	0.0412766
Os02g0234450	1.71667	0.77	-1.33812	0.0284985
Os02g0266900	0	0.945	6.58561	0.000731133
Os02g0274350	1.69	13.22	2.83536	0.000148199
Os02g0281200	0.683333	1.52	1.20592	0.0390909
Os02g0297200	0.486667	0.03	-4.28375	0.0118378
Os02g0302700	0.89	8.005	3.01999	1.05627e-11
Os02g0303500	0.03	1.045	4.90909	0.0430362
Os02g0448400	20.0767	47.415	1.10382	0.000747991
Os02g0456500	0.44	1.55	1.68013	0.00959241
Os02g0494400	6.59667	1.885	-1.94083	9.59014e-06
Os02g0526400	1.79333	4.8	1.27024	0.00151239
Os02g0532500	9.84333	24.555	1.18389	8.85695e-07
Os02g0559800	0.63	2.89	2.10222	0.00718331
Os02g0560200	0.63	2.89	2.10222	0.00718331
Os02g0560600	0.63	2.89	2.10222	0.00718331
Os02g0561000	0.63	2.89	2.10222	0.00718331
Os02g0561400	0.63	2.89	2.10222	0.00718331
Os02g0561800	0.63	2.89	2.10222	0.00718331
Os02g0570400	0.02	0.42	4.10356	0.040946
Os02g0574100	2.98	9.62	1.55531	5.4527e-08
Os02g0580900	11.34	6.26	-1.01433	7.61976e-06
Os02g0583000	1.02333	3.55	1.66667	0.0499809
Os02g0584700	4.34	13.185	1.47557	0.00961875
Os02g0584800	5.23667	14.29	1.32098	0.00607022
Os02g0585200	5.23333	13.02	1.1834	0.00492215
Os02g0588500	0.846667	5.355	2.5259	6.12895e-07
Os02g0589000	7.92333	22.985	1.39419	1.68476e-05
Os02g0600400	3.04667	8.99	1.42643	3.46294e-05
Os02g0606200	26.8067	13.58	-1.12061	2.93186e-07
Os02g0609900	0.67	3.265	2.13494	0.00227697
Os02g0621300	1.19	3.525	1.44136	0.0209003
Os02g0625500	27.9467	74.94	1.25715	8.51541e-12
Os02g0626100	19.0333	65.48	1.46051	1.86941e-06
Os02g0626400	6.74	24.895	1.67	9.22302e-10
Os02g0627100	0.28	2.695	3.12521	2.5131e-05
Os02g0630300	0.0566667	0.58	3.16268	0.0469115
Os02g0633066	0.39	1.355	1.64802	0.0281113
Os02g0641300	0.43	3.195	2.74998	1.21339e-05
Os02g0653000	0	6.065	6.13777	0.00781879
Os02g0654700	0.173333	3.975	4.35451	1.21363e-07
Os02g0655800	1.91	4.325	1.04605	0.0208755
Os02g0675100	4.64	1.98	-1.39378	0.0231724
Os02g0677300	2.83667	0.835	-1.91871	0.0438212
Os02g0686100	0.486667	3.62	2.74987	0.00282254
Os02g0687200	0.686667	3.395	2.16217	0.0174581
Os02g0690000	16.2633	7.46	-1.25145	0.00751984
Os02g0695800	3.88667	9.57	1.15512	0.00174998
Os02g0697550	17.8767	7.225	-1.44874	1.20067e-05
Os02g0715300	2.14667	7.28	1.62467	0.00110248
Os02g0718100	1.03667	6.405	2.50679	0.00570759
Os02g0718600	2.26333	11	2.15053	0.011321
Os02g0720900	3.32	7.595	1.01561	0.0225183
Os02g0731200	0.18	2.79	3.82579	0.000240737
Os02g0739400	0.58	2.375	1.89295	0.011395
Os02g0744600	3.93667	15.315	1.84225	0.0184897
Os02g0752701	72.8333	39.815	-1.01239	0.00317846
Os02g0755600	4.95667	2.515	-1.11145	0.00900749
Os02g0756800	18.4133	83.205	2.03304	4.81623e-12
Os02g0757700	5.92333	3.1	-1.11206	0.036921
Os02g0760200	1	3.265	1.42916	0.00356049
Os02g0763200	2.23333	5.255	1.09228	0.000882615
Os02g0768750	5.67	2.5	-1.32513	0.0330793
Os02g0778400	4.05333	12.26	1.45952	4.77399e-05
Os02g0781400	2.17667	7.005	1.60985	0.00400912
Os02g0791500	2.23333	5.92	1.12966	0.0162451
Os02g0801300	3.94	2.415	-1.0503	0.0136874
Os02g0802200	5.62	2.91	-1.08703	0.0119887
Os02g0823100	16.9733	37.54	1.01969	0.00522459
Os02g0831000	16.53	8.86	-1.0447	0.0206478
Os03g0103200	5.74333	147.3	4.53185	1.01125e-07
Os03g0103300	0.686667	6.685	3.13626	0.00128536
Os03g0104800	10.3767	5.46	-1.06556	1.98543e-06
Os03g0105500	0.02	1.03	5.46633	0.00780928
Os03g0107700	4.99	18.925	1.79157	1.34864e-06
Os03g0115700	0.166667	1.445	2.96631	0.00714347
Os03g0115800	0.02	43.31	10.9831	3.27402e-17
Os03g0122300	0.406667	2.465	2.90778	0.00122246
Os03g0128000	0.126667	1.61	3.69048	0.00906817
Os03g0129400	23.45	11.125	-1.21663	0.0479959
Os03g0138700	5.64667	17.495	1.49256	1.07081e-15
Os03g0150600	5.59667	13.59	1.13721	4.21397e-05
Os03g0159100	13.8267	31.88	1.07164	0.000162398
Os03g0167600	0.836667	0.175	-2.39482	0.0184897
Os03g0181100	0.246667	6.66	4.66001	1.47031e-06
Os03g0183000	6.91	3.125	-1.33038	4.18735e-05
Os03g0183800	7.77333	23.21	1.4484	1.60646e-11
Os03g0188900	0.643333	2.145	1.72834	0.0136874
Os03g0189400	2.40333	7.535	1.50695	0.00645734
Os03g0194900	0.936667	4.185	2.02786	4.39507e-05
Os03g0197200	0.233333	1.51	2.58917	0.0462971
Os03g0197800	11.38	6.17	-1.03214	0.000301908
Os03g0206700	14.51	5.195	-1.62636	5.94248e-16
Os03g0211900	9.16333	21.955	1.09301	2.66345e-06
Os03g0218400	4.96667	12.055	1.13718	3.83973e-05
Os03g0227400	2.62333	6.765	1.22684	0.00126618
Os03g0228200	20.1567	9.75	-1.19489	0.00387042
Os03g0231700	3.48667	1.455	-1.32114	0.000307295
Os03g0236200	0.126667	0.94	2.76288	0.00824179
Os03g0242200	10.1033	23.085	1.04847	3.44226e-05
Os03g0246500	3.03	3.195	1.1411	0.034121
Os03g0251000	8.15667	36.565	2.0223	0.0350015
Os03g0255100	1.74667	7.805	1.89871	4.13571e-08
Os03g0255500	226.337	112.69	-1.06436	6.84612e-16
Os03g0273200	0.01	1.81	7.19866	4.031e-06
Os03g0278000	67.94	155.38	1.07581	2.12737e-07
Os03g0280400	94.9067	31.875	-1.70614	2.77822e-08
Os03g0285100	35.07	11.655	-1.72616	1.84298e-16
Os03g0285800	1.72333	7.205	1.93016	9.27903e-06
Os03g0299200	0.18	1.85	3.24481	0.00535387
Os03g0300000	7.24333	20.25	1.33922	2.23006e-05
Os03g0300400	0.166667	1.85	3.33991	0.0431309
Os03g0302800	0.776667	8.18	3.26745	1.37465e-10
Os03g0315400	1.11333	6.085	2.30853	1.4403e-07
Os03g0316200	0.6	5.29	2.9785	0.0007493
Os03g0321700	1.14	4.25	1.82587	0.0236098
Os03g0327800	2.35	0.99	-1.37965	0.021253
Os03g0332100	12	26.345	1.00029	5.9502e-06
Os03g0341600	5.97333	19.335	1.55967	0.00807323
Os03g0347900	0.02	0.75	5.23084	0.000835334
Os03g0354500	1.40333	0.73	-1.10144	0.018482
Os03g0371300	57.9433	26.21	-1.27701	0.000278074
Os03g0371350	126.493	57.99	-1.24341	3.03494e-08
Os03g0375200	1.61	0.605	-1.54838	0.0468247
Os03g0386000	0.716667	2.02	1.69624	0.00319615
Os03g0386800	2.13	6.795	1.53979	1.83423e-05
Os03g0397700	1.13	3.505	1.54679	0.0256313
Os03g0400700	10.0133	29.515	1.4202	0.00614099
Os03g0402800	12.18	37.48	1.48044	1.65314e-07
Os03g0405500	0.956667	3.005	1.55622	0.0211389
Os03g0416200	0.223333	2.785	3.58007	8.97435e-05
Os03g0429000	19.9767	62.645	1.51419	3.55494e-11
Os03g0439500	10.4667	6.1	-1.06029	2.84706e-06
Os03g0568550	1.41333	0.465	-1.80382	0.0288588
Os03g0584400	0.0333333	0.865	4.46379	0.0287733
Os03g0602300	4.20333	9.95	1.11147	0.00566628
Os03g0603600	3.98	11.875	1.4357	2.02956e-05
Os03g0618900	3.93333	1.64	-1.42262	0.0430056
Os03g0624300	0.526667	6.91	3.58257	0.00232709
Os03g0629800	0	5.86	8.58202	3.77132e-09
Os03g0637900	1.45	5.04	1.65707	0.000842993
Os03g0646100	1.63333	6.22	1.81575	0.00269808
Os03g0647800	2.71667	6.365	1.10261	0.0192023
Os03g0650000	9.82667	24.79	1.20897	0.00346919
Os03g0650200	0.703333	2.16	1.46853	0.0426717
Os03g0661300	0.56	4.515	2.86363	4.78496e-06
Os03g0663400	1.88333	9.845	2.239	0.000718739
Os03g0663500	2.02	10.395	2.22096	0.0220195
Os03g0663600	6.00667	21.385	1.70272	0.0164564
Os03g0685300	4.10333	11.625	1.36858	0.0453058
Os03g0700700	0.596667	2.185	1.50401	0.0102461
Os03g0703000	2.64	14.41	2.28444	5.05222e-11
Os03g0709300	2.07333	8.025	1.82739	0.00439967
Os03g0711100	130.5	70.97	-1.01718	0.000133787
Os03g0718800	13.3833	100.99	2.7961	0.000152766
Os03g0728200	3.65	2.015	-1.0016	0.0121563
Os03g0729000	2.09667	7.105	1.62134	3.75802e-05
Os03g0736300	7.88333	37.705	2.10724	3.30635e-13
Os03g0743500	3.86667	9.76	1.2234	0.00429609
Os03g0746900	0.25	2	2.85622	0.0312292
Os03g0749300	10.4467	40.525	1.93485	1.85714e-12
Os03g0752800	208.973	28.025	-3.02425	1.65951e-09
Os03g0757500	2.12333	0.805	-1.56263	0.0219101
Os03g0757900	6.94667	22.83	1.57684	7.88379e-06
Os03g0764000	2.96	1.265	-1.36542	0.0184338
Os03g0770800	0.376667	2.23	2.42517	3.45884e-05
Os03g0773300	2.74333	7.855	1.2267	0.00159281
Os03g0775200	1.90667	4.505	1.09853	0.00279527
Os03g0775600	70.86	38.62	-1.01873	2.35561e-11
Os03g0775650	8.74667	1.825	-2.411	1.14999e-08
Os03g0775700	0.833333	15.3	4.06099	5.97513e-62
Os03g0788600	0.11	1.045	3.08255	0.0287455
Os03g0797400	0.636667	6.985	3.32528	1.71913e-10
Os03g0802500	2.16	5.215	1.12343	0.038865
Os03g0804500	1.05667	5.63	2.27727	0.00063525
Os03g0808100	7.35667	19.59	1.11774	9.03068e-06
Os03g0817800	0.236667	2.315	3.01654	0.000171113
Os03g0818200	5.63333	12.51	1.01012	0.00319615
Os03g0837100	7.59	22.615	1.11377	1.05476e-05
Os03g0854600	1.28667	3.49	1.31014	0.0449411
Os03g0856300	7.69	19.72	1.22689	0.00134007
Os03g0859900	0.31	2.035	2.57164	0.000323428
Os03g0862150	1.84667	10.205	2.34633	0.00115174
Os04g0101400	0.636667	2.085	1.59763	0.034121
Os04g0104900	2.56667	7.87	1.4853	0.00926724
Os04g0105200	0.81	4.115	2.222	0.0100278
Os04g0118450	1.56	0	-21.9727	4.60847e-05
Os04g0121800	1.83667	20.45	3.34708	7.02953e-05
Os04g0136700	45.2233	182.565	1.87426	1.08215e-34
Os04g0147600	15.23	8.08	-1.05011	0.00100097
Os04g0178400	0.413333	1.825	2.01208	0.0134594
Os04g0188433	15.97	56.065	1.67893	0.00104399
Os04g0225100	17.8567	8.855	-1.14663	0.000366341
Os04g0226600	2.50333	5.71	1.04967	0.00959241
Os04g0227500	1.44333	8.555	2.41715	0.000145263
Os04g0229100	0.09	1.675	4.07893	0.00167002
Os04g0233400	4.42667	11.175	1.20073	0.000141394
Os04g0249600	5.22	30.355	2.31237	1.31543e-10
Os04g0254300	0.286667	0.095	-1.80328	0.0279964
Os04g0307500	3.38	8.94	1.25311	0.0217706
Os04g0308100	2.65667	7.2	1.30782	0.00714347
Os04g0311400	2.58	7.245	1.37463	0.0310598
Os04g0338950	0.1	1.31	3.53498	0.0188932
Os04g0345400	0.856667	5.18	2.42441	5.2613e-08
Os04g0385900	11.9633	28.38	1.11406	2.27561e-05
Os04g0390800	0	1.24	6.62126	0.000604935
Os04g0391500	9.03333	23.115	1.20449	0.000401132
Os04g0406600	0.75	2.45	1.57013	0.013665
Os04g0408600	0.03	4.885	7.12447	1.9896e-05
Os04g0423100	0.453333	2.155	2.09673	0.0157301
Os04g0432000	8.02	18.5	1.00839	0.00353578
Os04g0444800	35.21	16.345	-1.24849	6.84612e-16
Os04g0449000	4.04333	1.915	-1.27611	0.0348341
Os04g0455600	1.90667	8.35	1.99805	1.58708e-06
Os04g0456700	14.87	42.57	1.37374	4.82742e-06
Os04g0458200	26.6267	14.165	-1.13586	3.68993e-08
Os04g0464750	2.80333	9.975	1.70151	0.0116847
Os04g0468600	1.22333	6.27	2.18931	0.000860506
Os04g0469000	4.28667	24.685	2.38976	1.0875e-10
Os04g0473900	1.34333	0.63	-1.23293	3.92807e-05
Os04g0474500	1.22333	3.655	1.40088	0.0369664
Os04g0474800	27.9433	85.845	1.49084	1.62936e-11
Os04g0475100	1.02667	0.18	-2.70707	0.00191631
Os04g0477300	1.13	2.975	1.34035	0.0368695
Os04g0492500	9.21667	3.96	-1.3585	0.038865
Os04g0497000	19.66	52.8	1.28222	0.000147488
Os04g0498650	700.683	303.4	-1.34674	1.54299e-10
Os04g0517100	0.116667	1.5	3.60623	0.00305255
Os04g0518400	1.03	2.775	1.29217	0.00671198
Os04g0524500	2.99	6.645	1.00732	0.0118378
Os04g0524600	1.09	3.585	1.57621	0.0134553
Os04g0550200	5.35	21.46	1.86899	1.10417e-10
Os04g0555300	59.6967	23.5	-1.56397	2.95968e-09
Os04g0556400	0.03	0.88	4.84931	0.00051421
Os04g0563000	1.81333	5.585	1.48887	0.00140411
Os04g0573200	22.4633	53.505	1.08288	0.00125793
Os04g0578200	10.8033	4.845	-1.29848	0.00162028
Os04g0578400	22.7	9.12	-1.4544	3.31507e-08
Os04g0581000	0.423333	2.38	2.3464	0.0301652
Os04g0592400	2.16333	5.645	1.12655	0.00680384
Os04g0594400	0.94	3.375	1.70856	0.0362247
Os04g0600200	2.36667	6.3	1.26783	0.00312124
Os04g0600300	0.133333	2.135	3.9141	0.000143004
Os04g0604300	0.876667	3.95	2.02881	0.00617716
Os04g0606200	11.0933	5.315	-1.19333	0.00959638
Os04g0613700	3.21333	9.52	1.54808	0.00278665
Os04g0618200	2.69333	6.68	1.15737	0.000956763
Os04g0628900	7.53333	3.73	-1.15102	0.0385418
Os04g0629700	1.96	6.795	1.52497	0.000153654
Os04g0630400	4.80333	11.33	1.10127	0.000209127
Os04g0632600	2.33667	6.905	1.42961	5.94045e-08
Os04g0667600	9.48333	33.96	1.70874	1.5139e-11
Os04g0684900	0.546667	4.125	2.77484	0.000240351
Os04g0689500	6.36	15.395	1.13616	0.00162028
Os04g0690800	41.6133	105.09	1.20375	3.89507e-12
Os05g0100100	0.85	3.365	1.83903	0.00541176
Os05g0102000	0.193333	1.53	2.85609	0.00216632
Os05g0114000	3.68667	18.915	2.21645	1.82703e-12
Os05g0116500	1.32667	3.505	1.26507	0.0114016
Os05g0123100	3.79667	10.57	1.35383	0.000155806
Os05g0127200	0.22	2.52	3.46383	3.69005e-06
Os05g0127500	2.53	7.25	1.37576	0.000209195
Os05g0130300	7.63667	19.12	1.19094	7.24545e-05
Os05g0134400	0.21	4.815	4.6076	6.05422e-07
Os05g0135500	0	9.835	9.83341	3.68728e-12
Os05g0136900	4.07	17.63	1.98234	1.44163e-09
Os05g0137100	0.386667	0.02	-5.5775	0.0373338
Os05g0138300	165.097	455.32	1.34169	4.75227e-11
Os05g0142000	7.84667	21.375	1.32338	0.0334804
Os05g0142100	7.50333	32.78	1.99529	3.89397e-10
Os05g0142200	14.8233	41.935	1.36958	1.14226e-06
Os05g0149400	1.32333	11.5	3.00584	3.92255e-10
Os05g0153000	0	0.265	5.8707	0.0151507
Os05g0159300	3.23333	8.925	1.3107	0.000940653
Os05g0160600	4.67667	2.53	-1.02257	0.0408272
Os05g0161500	10.7367	32.795	1.46832	2.10588e-08
Os05g0163300	0.0233333	0.885	4.96964	0.0360334
Os05g0169200	0.163333	0.93	2.35514	0.044077
Os05g0176100	8.34667	52.245	2.3862	1.12774e-13
Os05g0178300	30.4833	88.725	1.41212	1.47712e-05
Os05g0179300	3.43	9.32	1.30676	1.09884e-05
Os05g0181700	1.24667	5.695	2.06226	0.00849614
Os05g0209500	2.26333	7.995	1.6973	0.0114016
Os05g0217700	20.93	184.05	2.98665	1.16585e-26
Os05g0217800	31.9767	473.595	3.74091	1.62857e-67
Os05g0227600	61.8967	190.875	1.47757	1.49238e-12
Os05g0244500	5.94667	17.21	1.3428	2.56857e-06
Os05g0247100	9.28667	163.465	3.98065	3.04679e-09
Os05g0296800	0.23	1.135	2.21774	0.00647623
Os05g0322900	7.57333	36.055	2.11215	1.06103e-18
Os05g0361000	4	1.22	-1.85479	1.32855e-05
Os05g0363200	10.4567	25.12	1.12572	1.68497e-05
Os05g0375400	24.2	11.78	-1.18461	1.02115e-05
Os05g0382600	3.87333	11.425	1.42352	1.10828e-05
Os05g0382900	4.46667	10.18	1.0816	0.00104399
Os05g0386700	0.0266667	1.085	5.94649	0.000106853
Os05g0386800	8.19333	38.395	2.0966	1.79744e-15
Os05g0389000	3.07	7.725	1.21986	0.00361105
Os05g0391200	2.46	5.735	1.07835	0.0317428
Os05g0432200	3.99	18.68	2.09815	9.34208e-05
Os05g0436950	0	0.41	5.61815	0.0296424
Os05g0442700	2.99667	0.545	-2.62107	0.0159212
Os05g0445100	1.99667	5.475	1.44974	0.0234661
Os05g0453300	3.83667	1.96	-1.11839	0.0011079
Os05g0462000	281.627	85.99	-1.82611	6.88602e-28
Os05g0462500	0.106667	0.91	2.92765	0.0271609
Os05g0477600	0.21	5.36	4.05201	3.57841e-08
Os05g0494200	49.4933	110.695	1.01073	7.22472e-05
Os05g0497300	20.1433	49.55	1.1686	3.92807e-05
Os05g0500000	7.95333	2.525	-1.82468	0.00954368
Os05g0500200	0.363333	1.3	1.69465	0.0110556
Os05g0501300	0.646667	4.27	2.58555	0.0175929
Os05g0503000	9.09333	22.83	1.19044	8.05557e-07
Os05g0508400	2.79333	6.715	1.13088	0.00383235
Os05g0509500	0.253333	1.175	2.06071	0.0491971
Os05g0537100	4.77333	31.215	2.56996	2.1214e-14
Os05g0543600	0.02	1.095	5.62061	0.00450414
Os05g0550300	0.113333	3.24	4.70284	0.0366071
Os05g0556400	0.133333	1.835	3.61819	0.00195116
Os05g0563300	4.45	1.61	-1.60277	0.034121
Os05g0563600	0.7	17.935	4.53842	1.491e-18
Os05g0564400	2.92333	6.955	1.11728	0.0494037
Os05g0571200	0.0266667	1.055	5.08817	0.0242936
Os05g0579200	0.703333	0.155	-2.30587	0.0394563
Os05g0580200	0	3.915	7.62048	2.45735e-06
Os05g0586600	36.9067	17.07	-1.25028	0.000190187
Os05g0590300	44.4267	21.945	-1.14718	0.000293235
Os05g0592300	5.84	2.585	-1.30817	0.00037775
Os06g0109200	1.03	5.565	2.27651	0.00389448
Os06g0109300	0.77	3.825	2.15625	0.0064104
Os06g0109500	0.25	2.545	3.19919	0.00568307
Os06g0118900	0.533333	2.88	2.30457	0.0314958
Os06g0119100	1.36333	3.905	1.39701	0.00158089
Os06g0125800	26.2	58.985	1.03514	0.00710226
Os06g0126500	0.303333	2.615	2.95939	0.000404556
Os06g0128800	0	1.305	6.20311	0.0037446
Os06g0129100	0.503333	2.645	2.24007	0.00388685
Os06g0131300	48.82	16.65	-1.6949	1.08284e-33
Os06g0131700	0.91	3.695	1.92038	7.22683e-05
Os06g0141200	179.74	63.38	-1.63847	2.13148e-20
Os06g0157500	23.65	5.04	-2.36286	8.45646e-10
Os06g0163300	1.04333	4.285	1.89385	0.00311468
Os06g0176700	3.55333	9.605	1.30367	4.70604e-05
Os06g0178500	3.55333	9.605	1.30367	4.70604e-05
Os06g0186300	0.16	0.875	2.34932	0.0288027
Os06g0188700	2.63	1.32	-1.13178	0.0237416
Os06g0200800	0.0233333	1.24	5.37415	0.0105968
Os06g0203600	1.22667	2.905	1.10425	0.0317057
Os06g0215100	0.113333	1.025	3.1266	0.0142436
Os06g0215900	0.703333	4.265	2.48218	0.00108422
Os06g0216300	1.48667	5.66	1.814	0.00749082
Os06g0216700	6.35333	19.28	1.48169	0.0163775
Os06g0218600	0.0633333	6.06	7.27683	4.55706e-06
Os06g0226950	0.443333	2.67	2.43414	0.00357276
Os06g0227250	0.27	1.785	2.58208	0.0187629
Os06g0245900	0.826667	3.68	2.01058	0.000404556
Os06g0254700	3.46	9.25	1.28513	0.0278137
Os06g0267900	0.246667	0	-6.46496	0.00257084
Os06g0275700	2.14333	1.145	-1.04283	0.0167941
Os06g0289900	5.80667	13.79	1.10938	0.0100278
Os06g0294000	1.78	4.5	1.20601	0.000262351
Os06g0315000	0.0533333	13.26	7.75801	1.84519e-10
Os06g0316800	0.433333	5.18	3.45765	8.82556e-05
Os06g0317200	0.0733333	1.865	4.97949	0.0326989
Os06g0320200	4.23667	14.19	1.6364	0.000882615
Os06g0340301	8.34333	4.455	-1.04776	0.0219451
Os06g0356800	0.673333	4.73	2.67337	6.87764e-05
Os06g0472350	0.346667	0	-5.52901	0.0407336
Os06g0493100	3.52667	135.955	5.13419	5.68727e-06
Os06g0494400	0.873333	2.475	1.36435	0.0380957
Os06g0506200	0.12	1.33	3.48758	0.00371627
Os06g0543601	1.10667	25.88	4.41249	4.50927e-45
Os06g0554300	0.873333	3.04	1.66678	0.00331047
Os06g0561000	0.786667	5.96	2.78713	4.40755e-07
Os06g0564700	0.05	0.79	3.89235	0.037447
Os06g0567200	1.63	5.41	1.61329	0.0167605
Os06g0569500	10.8367	24.35	1.02991	2.22291e-05
Os06g0571800	33.5467	16.495	-1.19386	1.22459e-05
Os06g0573600	2.39667	4.805	1.37946	0.00764697
Os06g0579100	0.223333	1.85	2.86435	0.00350597
Os06g0582600	11.5267	37.065	1.53253	0.000642315
Os06g0586000	3.03333	13.965	2.07436	0.00713189
Os06g0589500	0.123333	2.13	3.96826	0.000560093
Os06g0589600	5.21	17.965	1.65359	1.33649e-07
Os06g0591400	47.25	170.245	1.71545	9.22302e-10
Os06g0594300	0.386667	0	-5.6466	0.0285843
Os06g0602500	0.64	2.565	1.87016	0.000102618
Os06g0632200	1.58	4.59	1.3991	0.0005247
Os06g0637500	1.47667	4.41	1.43861	0.00556562
Os06g0642500	1.74	0.65	-1.55974	0.00569218
Os06g0649600	1.79667	9.44	2.24422	7.80937e-09
Os06g0665500	32.82	16.16	-1.16175	1.23996e-09
Os06g0674000	1.06333	2.935	1.31996	9.14402e-06
Os06g0676600	1.92333	4.565	1.1118	0.0385738
Os06g0681600	2.22333	8.8	1.83447	6.08028e-06
Os06g0683100	0.46	3.215	2.66887	0.00234344
Os06g0683400	26.0767	102.92	1.86033	1.96914e-08
Os06g0696600	38.75	158.28	1.889	0.0024969
Os06g0697000	28.36	103.49	1.7934	1.11946e-10
Os06g0699050	14.47	1.8	-3.15903	2.82979e-21
Os06g0703800	4.97	12.03	1.13832	0.00805457
Os06g0715100	9.75667	22.97	1.09506	2.75517e-07
Os06g0725200	0.693333	9.145	3.57406	6.29544e-17
Os06g0726100	0.133333	1.56	3.38843	0.0338639
Os06g0726200	4.42667	19.565	2.0053	0.000252794
Os06g0727300	1.71667	3.9	1.04074	0.0453638
Os07g0102200	0.22	1.195	2.29763	0.0149856
Os07g0103500	0.103333	1.27	3.59111	0.00266291
Os07g0106200	7.71333	31.595	1.93471	9.34795e-10
Os07g0108900	1.37667	0.075	-4.18087	0.00221384
Os07g0121000	0.616667	1.855	1.44556	0.0351448
Os07g0122000	0.06	0.615	3.2453	0.0314958
Os07g0129200	0.663333	6.89	3.21487	0.000878041
Os07g0147900	15.38	36.025	1.08804	4.90867e-05
Os07g0150100	7.94333	20.795	1.24575	5.43677e-08
Os07g0151800	3.93	13.25	1.63399	0.0111064
Os07g0160300	5.70333	16.395	1.37968	1.65291e-06
Os07g0160600	0.513333	4.715	3.04615	3.22712e-06
Os07g0164800	7.05	16.36	1.08318	0.00130382
Os07g0166700	1.25	3.205	1.22714	0.00418925
Os07g0168300	21.1467	55.925	1.2639	3.64212e-07
Os07g0176400	3.50667	8.685	1.16811	0.0158802
Os07g0195300	0.95	3.295	1.65845	0.0175131
Os07g0195350	2.27	1.03	-1.29068	0.00279527
Os07g0204400	0.06	2.535	5.1238	0.0323952
Os07g0208500	4.98333	28.47	2.13455	1.31291e-08
Os07g0208533	2.23333	14.84	2.63451	6.94135e-07
Os07g0230700	3.09	11.525	1.76812	0.00043512
Os07g0235200	2.82667	7.025	1.168	0.000960907
Os07g0241500	2.70667	6.12	1.03109	0.0247995
Os07g0248900	3.34333	1.495	-1.30474	0.00147464
Os07g0252400	2.68	11.215	1.90197	3.52766e-06
Os07g0258100	15.9433	5.37	-1.71452	1.30799e-09
Os07g0274700	5.26667	21.67	1.91645	8.82556e-05
Os07g0283125	24.89	10.92	-1.33261	2.85558e-05
Os07g0290200	31.55	86.68	1.33768	7.56024e-05
Os07g0408400	2.22667	0.855	-1.50831	0.0493753
Os07g0413800	12.8767	35.545	1.36682	3.00654e-08
Os07g0424400	7.74333	31.95	1.80508	0.00794789
Os07g0445600	2.1	5.92	1.36419	0.00063525
Os07g0448100	1.40333	5.09	1.72984	0.00247001
Os07g0462200	2.94667	11.25	1.79537	1.20059e-05
Os07g0471300	0.39	1.98	2.20148	0.000202973
Os07g0484800	2.76	10.585	1.81017	0.000293151
Os07g0491800	0.306667	1.545	2.19124	0.00645734
Os07g0496250	2.34	9.525	1.91191	0.0100939
Os07g0503200	0	0.365	5.46961	0.0456873
Os07g0511400	0	8.225	8.23391	4.7572e-08
Os07g0522500	11.02	27.63	1.17837	0.000128717
Os07g0537900	0.27	2.14	2.82633	0.000126906
Os07g0538200	0.16	0.955	2.40525	0.0357726
Os07g0539100	0.146667	5.17	4.98258	0.00556712
Os07g0543500	1.16333	5	1.95882	5.69812e-10
Os07g0563400	0.646667	2.42	1.75449	0.0325839
Os07g0575600	2.71333	1.035	-1.52277	0.00210656
Os07g0582400	8.21667	26.92	1.57285	4.36031e-14
Os07g0590700	1.89	7.61	1.88268	0.0126929
Os07g0592600	0.06	0.885	3.70263	0.0247896
Os07g0601900	0.0133333	2.2	7.04912	1.68497e-05
Os07g0604300	1.25333	4.415	1.68899	0.00260938
Os07g0604400	0	1.665	7.28537	2.75538e-05
Os07g0605400	13.23	34.83	1.25335	0.00053083
Os07g0615200	23.1467	65.125	1.34484	6.32699e-07
Os07g0617100	6.83667	17.95	1.25599	0.00647623
Os07g0620400	2.86	7.795	1.30396	0.0016765
Os07g0623600	1.2	3.245	1.30146	0.0487654
Os07g0624100	5.58667	17.175	1.48629	1.38963e-07
Os07g0624700	10.8333	26.01	1.12934	0.000171113
Os07g0631700	0.83	5.825	2.67859	5.39268e-05
Os07g0633600	0.656667	8.49	2.9195	4.97849e-07
Os07g0637400	4.82667	11.025	1.05321	0.00147966
Os07g0645000	0.09	2.445	4.56647	0.00319892
Os07g0646100	2.97667	1.33	-1.30466	0.0376818
Os07g0656200	0.716667	2.775	1.81656	0.00125636
Os07g0656600	0.273333	2.005	2.74912	0.0220428
Os07g0663800	4.17667	11.39	1.31268	0.000237066
Os07g0677200	1.38	11.31	2.91743	0.000115067
Os07g0687100	1.03333	3.705	1.7149	0.0256542
Os08g0113100	17.55	41.005	1.09722	3.83564e-05
Os08g0114300	0	1.435	7.7137	1.97495e-06
Os08g0127100	4.53667	23.025	2.20044	7.45008e-20
Os08g0139700	12.0433	33.715	1.34791	7.26795e-11
Os08g0152366	8.29667	4.3	-1.08401	0.00033258
Os08g0153600	2.16667	0.875	-1.45059	0.0137064
Os08g0154300	2.76333	7.125	1.2277	0.00029871
Os08g0157500	20.2267	63.74	1.52939	1.24746e-05
Os08g0158200	3.24667	7.175	1.00703	0.0223143
Os08g0160500	0.666667	4.68	2.78976	8.17317e-10
Os08g0167800	0.0166667	0.71	5.26446	0.0324059
Os08g0176200	1.04	3.06	1.40933	0.0246027
Os08g0178900	0	37.035	12.2316	2.11895e-21
Os08g0181750	2.41333	1.09	-1.29138	0.00734838
Os08g0197500	0.883333	3.035	1.63764	7.006e-06
Os08g0200600	8.26333	2.225	-2.0658	3.08612e-08
Os08g0237000	5.23333	13.33	1.21282	0.000916341
Os08g0276000	1.94667	5.035	1.22946	0.000164185
Os08g0278900	4.44333	10.365	1.08686	0.00190124
Os08g0307400	13.1867	6.485	-1.16198	1.9632e-10
Os08g0321000	0.896667	9.03	3.19417	2.08655e-06
Os08g0331000	0.62	10.055	3.90553	0.00101037
Os08g0331800	0	6.835	7.36767	3.28121e-05
Os08g0355400	4.19	10.84	1.23038	0.00237517
Os08g0356700	1.11	2.775	1.19279	0.0280774
Os08g0356800	0.8	3	1.77471	0.00210656
Os08g0375400	0.79	3.97	2.19079	0.0264297
Os08g0386200	2.57333	6.025	1.09027	0.00943403
Os08g0389700	8.69	41.285	2.10519	3.31353e-10
Os08g0395700	1.83333	21.125	3.37862	5.48959e-21
Os08g0396700	4.22667	2.045	-1.23296	2.74219e-05
Os08g0415400	0.576667	104.88	7.37593	3.52102e-09
Os08g0430800	17.2967	8.605	-1.15557	1.92125e-05
Os08g0438600	1.03	3.335	1.56208	0.000478031
Os08g0459300	0.48	3.43	2.70558	0.000364192
Os08g0460000	0.45	4.63	3.22717	6.95906e-05
Os08g0470200	0.0766667	2.465	4.99449	0.00319975
Os08g0475400	1.68667	4.35	1.22166	0.0373052
Os08g0476300	2.05	4.8	1.09466	0.0491971
Os08g0482700	30.31	79.625	1.22976	0.000147215
Os08g0489300	0	1.725	7.34148	7.58734e-05
Os08g0498100	8.74	34.235	1.83683	1.82778e-10
Os08g0498400	7.70333	46.205	2.45059	6.84612e-16
Os08g0502400	3.49667	8.46	1.13984	0.0274254
Os08g0509200	6.19333	15.24	1.16469	0.000545902
Os08g0522500	20.0367	59.39	1.42671	2.52979e-17
Os08g0524800	2.06	5.44	1.26236	0.00169909
Os08g0525000	3.00333	7.4	1.16357	0.014026
Os08g0529100	1.59	4.93	1.49364	0.0142641
Os08g0531000	23.3633	65.36	1.30895	1.73102e-17
Os08g0531100	0.04	1.105	4.57314	0.000815327
Os08g0531900	0.136667	1.74	3.55786	0.00986746
Os08g0546100	0.133333	2.405	4.00584	0.000702769
Os08g0554400	14.5867	6.68	-1.26936	3.96109e-08
Os08g0556900	1.87333	6.995	1.80962	0.00216632
Os09g0127300	0.0133333	0.78	5.47341	0.00900411
Os09g0240200	30.0467	13.845	-1.26469	0.00033237
Os09g0248100	0	1.62	7.30233	4.70604e-05
Os09g0267800	0.88	2.815	1.52983	0.0124648
Os09g0268600	0.00666667	0.545	6.09781	0.00163287
Os09g0283600	0.0733333	0.88	3.48921	0.040482
Os09g0284250	2.89667	0.565	-2.49651	0.00360304
Os09g0293400	6.04667	13.68	1.04379	0.0404953
Os09g0298200	10.0933	27.25	1.29416	4.19442e-13
Os09g0309500	9.64333	5.105	-1.05523	0.00346919
Os09g0313600	0.56	0.07	-3.26995	0.00807323
Os09g0315200	14.0233	7.38	-1.07359	0.000710223
Os09g0323000	3.56667	10.585	1.63116	1.43948e-05
Os09g0347300	0.976667	2.955	1.45548	0.00454404
Os09g0356200	0.273333	1.11	1.87054	0.0353569
Os09g0394300	1.23	3.18	1.22599	0.0369979
Os09g0397400	1.93667	5.11	1.25929	0.000578055
Os09g0410125	12.68	5.325	-1.38494	0.00179306
Os09g0412300	11.7367	35.05	1.44658	0.000395365
Os09g0416500	15.0767	0.63	-4.72219	4.33551e-22
Os09g0419200	75.65	166.155	1.00688	0.000615692
Os09g0425500	0.883333	5.2	2.43795	0.0488256
Os09g0439200	2.82333	9.795	1.65803	4.07381e-06
Os09g0439700	3.15333	6.99	1.00156	0.00147464
Os09g0448200	4.74333	12.01	1.16599	0.000363809
Os09g0451000	7.97667	29.885	1.77332	1.57365e-14
Os09g0451400	0.08	5.295	6.10811	8.24802e-11
Os09g0452900	2.61667	6.16	1.09029	0.00678173
Os09g0456100	0.116667	1.2	3.33997	0.000652232
Os09g0463300	20.6533	10.225	-1.2107	6.6482e-08
Os09g0467200	56.3833	152.46	1.29642	3.05459e-13
Os09g0471500	1.77333	4.555	1.21481	0.00565234
Os09g0472900	0.51	4.03	2.85961	0.00849614
Os09g0478100	24.2133	51.19	1.05649	2.09609e-10
Os09g0482200	3.46333	9.005	1.24715	0.00217199
Os09g0482500	3.46333	9.005	1.24715	0.00217199
Os09g0494200	2.40667	12.475	2.25726	8.21563e-12
Os09g0500900	0.106667	1.235	3.34169	0.00934588
Os09g0513500	34.9333	17.14	-1.18075	0.0208232
Os09g0528000	1.56333	0.515	-1.9971	0.00158388
Os09g0530250	2.52	0.945	-1.56289	0.000283267
Os09g0532000	0.62	2.08	1.61501	0.0444368
Os09g0532800	6.04667	3.165	-1.07938	5.92924e-05
Os09g0533900	2.11667	13.805	2.5479	0.0088922
Os09g0537700	85.97	589.715	2.64774	1.60224e-05
Os09g0538000	0.0233333	6.455	7.94973	7.79949e-08
Os09g0540400	0.426667	3.625	3.03908	1.51996e-05
Os09g0553900	4.57333	1.97	-1.35556	0.000643874
Os09g0566050	0.63	0	-5.96726	0.0126929
Os09g0570100	0.65	3.155	2.15744	0.00699467
Os09g0571200	3.11	8.18	1.25824	0.0190221
Os10g0104000	0	0.205	5.99426	0.00847368
Os10g0109300	0.0166667	1.18	5.77041	0.00803063
Os10g0109600	0.0866667	2.7	4.79417	0.000155806
Os10g0130800	1.11667	2.585	1.07479	0.00554445
Os10g0132500	0.103333	0.465	2.06404	0.0454515
Os10g0132800	3.77333	1.98	-1.06968	0.0131085
Os10g0158000	5.04	2.58	-1.10272	0.00202625
Os10g0162400	0.396667	1.23	1.48382	0.0258477
Os10g0178500	0.996667	0.23	-2.27121	0.0184699
Os10g0181333	0.443333	0.08	-2.82789	0.0176608
Os10g0205700	1.61	7.45	2.07416	0.000721717
Os10g0392400	0.153333	4	4.55086	0.000196593
Os10g0396300	7.4	18.37	1.1729	0.00168401
Os10g0397900	0.116667	2.675	4.34177	0.00432122
Os10g0416500	0.226667	2.535	3.33866	0.00317846
Os10g0419400	0.826667	4.73	2.37827	0.000684623
Os10g0439924	3.31	27.905	2.93968	7.76303e-37
Os10g0444700	10.8567	35.095	1.54983	9.25008e-23
Os10g0450800	3.00667	26.38	3.00183	1.88604e-22
Os10g0450900	23.0467	204.035	3.0136	8.83967e-78
Os10g0456400	3.93333	9.125	1.07831	0.00023301
Os10g0468500	0.08	0.425	2.35461	0.0321834
Os10g0469700	3.44	9.805	1.36713	0.0022629
Os10g0491000	48.55	245.155	2.1967	3.44851e-29
Os10g0491400	0.553333	4	2.72014	0.0350015
Os10g0497600	2.75667	6.06	1.0099	0.000465364
Os10g0499400	8.63	4.385	-1.10862	0.0100309
Os10g0503250	0.0533333	1.975	5.0136	0.00348805
Os10g0503300	0.546667	23.395	5.23926	0.0158876
Os10g0510400	7.89	25.04	1.51845	2.52979e-17
Os10g0515200	9.81667	5.395	-1.00477	1.70711e-05
Os10g0517500	3.37	10.715	1.53188	0.00171422
Os10g0519400	2.46667	0.94	-1.53359	0.019028
Os10g0521900	1.91667	7.39	1.81235	6.32447e-05
Os10g0527800	0.863333	5.485	2.52994	0.000149455
Os10g0530800	0.22	1.155	2.40671	0.0444687
Os10g0530900	13.1767	47.62	1.73145	7.60031e-05
Os10g0531400	8.83667	21.23	1.12469	0.00688443
Os10g0533500	15.3	7.31	-1.2038	6.08028e-06
Os10g0539700	3.93	2.09	-1.05532	0.00105955
Os10g0542900	5.29333	37.045	2.65281	1.96914e-08
Os10g0555900	0.843333	7.395	2.98761	7.56024e-05
Os10g0557900	12.1433	6.395	-1.0645	0.000242322
Os10g0558700	1.16333	4.65	1.66937	0.00294414
Os10g0558900	1.10333	3.445	1.49302	0.032626
Os10g0560000	0.34	3.405	2.79294	0.00221614
Os10g0560400	7.67	4.025	-1.07187	0.0123609
Os10g0570200	34.0133	139.675	1.90027	2.90183e-07
Os10g0578700	3.19	1.255	-1.51274	0.00866222
Os10g0578800	75.7833	40.055	-1.10685	3.64451e-07
Os10g0578950	3.64333	1.61	-1.31509	0.00380871
Os11g0104300	23.39	12.055	-1.09031	9.48548e-05
Os11g0107425	1.1	0	-7.47895	8.43511e-05
Os11g0108800	0.893333	2.475	1.33392	0.0242451
Os11g0108932	3.69333	1.735	-1.24431	0.000463155
Os11g0115350	2.7	25.945	3.11963	6.50292e-07
Os11g0115400	139.85	319.17	1.06135	1.91498e-09
Os11g0128700	1.19667	2.895	1.14799	0.017804
Os11g0132600	4.42	12.86	1.30535	0.000104963
Os11g0146300	0.123333	1.48	3.4207	0.0499809
Os11g0149400	0	1.345	6.05457	0.00693079
Os11g0154500	0.123333	0.785	2.59872	0.032626
Os11g0161700	3.9	8.89	1.04781	0.000923752
Os11g0167800	417.277	1147.4	1.32737	3.2851e-17
Os11g0170100	0.833333	0.34	-1.4468	0.0474661
Os11g0175400	4.62667	15.27	1.57498	1.33512e-08
Os11g0182500	22.23	85.715	1.79719	0.0373133
Os11g0183800	1.14333	2.715	1.10635	0.0240565
Os11g0183900	9.05	27.74	1.44117	1.00942e-10
Os11g0210201	0.736667	8.795	3.46093	0.000243588
Os11g0227250	0.993333	2.455	1.18431	0.0390909
Os11g0229300	0.31	1.9	2.53705	0.00210656
Os11g0240600	20.0633	10.55	-1.06906	1.67932e-06
Os11g0264500	13.68	4.325	-1.79915	1.35771e-09
Os11g0286800	9.62333	42.005	1.9462	1.85317e-13
Os11g0289700	0.0933333	1.87	4.12018	0.000275937
Os11g0416900	11.08	5.895	-1.0505	2.9495e-07
Os11g0427800	0.466667	4.915	3.42425	2.37449e-05
Os11g0432800	0.976667	2.72	1.34451	0.0403045
Os11g0432900	28	153.8	2.19397	7.92503e-19
Os11g0438500	0.3	1.35	2.01949	0.0432485
Os11g0444700	15.2167	7.785	-1.09726	0.0395152
Os11g0471300	6.75333	22.265	1.56518	1.9896e-05
Os11g0473000	14.64	34.485	1.1015	2.79295e-07
Os11g0502700	0.113333	3.28	4.6893	0.000185287
Os11g0514400	1.01	6.52	2.54299	0.0211227
Os11g0532200	15.9167	6.37	-1.46316	3.65876e-06
Os11g0552000	0.353333	1.305	1.75778	0.00678367
Os11g0559200	0.386667	1.575	1.88337	0.0237668
Os11g0565920	0.636667	2.7	1.94396	1.8165e-05
Os11g0568300	8.45333	4.32	-1.10075	0.00136486
Os11g0614400	0.193333	1.31	2.63084	0.0187506
Os11g0660000	4.26333	11.65	1.30856	1.32566e-06
Os11g0661800	2.03333	6.265	1.47884	0.000978273
Os11g0661900	3.49333	9.505	1.29738	0.00127072
Os11g0669100	0.833333	2.87	1.64775	0.005157
Os11g0683500	11.3333	5.985	-1.06541	1.7974e-06
Os11g0704500	115.533	267.695	1.08681	0.00111238
Os11g0708100	0.0566667	1.74	4.77951	0.00272152
Os11g0708900	0.433333	2.08	2.14027	0.00454404
Os12g0102600	50.0667	26.805	-1.04246	1.34233e-15
Os12g0106300	0	0.39	5.60554	0.035684
Os12g0114900	3.08	25.875	2.92769	5.94406e-06
Os12g0115300	285.783	629.715	1.01081	7.61976e-06
Os12g0115700	7.37	17.955	1.14433	0.0198461
Os12g0123500	0.656667	14.45	4.3269	3.95502e-20
Os12g0147800	11.6567	55.29	2.12405	8.45228e-09
Os12g0159000	4.34667	13.415	1.49427	0.000767322
Os12g0170800	0.276667	2.735	3.13833	0.0115501
Os12g0184167	2.44333	1	-1.44022	0.00482831
Os12g0225150	1.04333	0.31	-2.02617	0.0370591
Os12g0236400	1.23	3.84	1.51073	0.0441186
Os12g0248600	4.25333	11.63	1.31867	0.0466284
Os12g0263000	22.4967	54.405	1.13294	1.03697e-05
Os12g0268000	0.293333	1.335	2.03576	0.0194391
Os12g0280801	11.34	4.4	-1.50906	1.94208e-05
Os12g0291066	62.6133	33.255	-1.05441	1.76765e-07
Os12g0432301	0.973333	0.36	-1.60205	0.0198968
Os12g0443500	1.39667	3.64	1.24176	0.00639154
Os12g0503000	0.526667	2.735	2.23953	0.0306519
Os12g0504050	139.32	606.515	2.00532	2.35561e-11
Os12g0516000	49.7567	136.49	1.33394	4.99636e-05
Os12g0520200	15.36	64.355	1.93082	4.4048e-20
Os12g0528801	8.92	69.635	2.89903	5.26838e-05
Os12g0541700	1.85	5.745	1.50187	0.030177
Os12g0547600	5.28333	21.585	1.88966	1.1211e-06
Os12g0555000	6.03333	21.775	1.70038	0.00492215
Os12g0581600	5.90667	3.04	-1.10363	0.000674517
Os12g0583300	18.99	69.325	1.71792	2.73458e-07
Os12g0604000	1.55333	0.47	-1.85861	0.00278
Os12g0617400	6.04	3.03	-1.13662	7.05782e-05
Os12g0628400	1.29667	3.79	1.39962	0.0110246
Os12g0628600	57.8267	297.53	2.21283	0.0440769
Os12g0639600	0.536667	2.275	1.93843	0.00149604
