# Supplementary material for: Rice cellulose synthase-like protein OsCSLD4 coordinates the trade-off between plant growth and defense
Source: Front Plant Sci. 2022 Sep 26;13:980424. doi: 10.3389/fpls.2022.980424 (PMC9548992; doi:10.3389/fpls.2022.980424)
Supplement: Supplementary Table 4 — All metabolites identified in WT and dnl19 mutant. [file Table_2.xlsx]

## Sheet: Sheet1
Supplementary Table 4. All metabolites identified in WT and dnl19 mutant.
Compound name	CAS	KEGG_ID	Formula	Class_EN	Mean WT	Mean dnl19	VIP	P-VALUE
(+)-Abscisic acid	21293-29-8	C06082	C15H20O4	Phytohormone	5.23355e-05	5.17079e-05	0.0693969	0.972279
N-((-)-jasmonoyl)-S-isoleucine	120330-92-9	C18699	C18H29NO4	Phytohormone	1.13796e-05	8.66831e-06	1.02277	0.279393
1-Aminocyclopropanecarboxylic acid	22059-21-8		C4H7NO2	Phytohormone	0.000964217	0.00290298	1.22912	0.259439
4-Aminobutyric acid	56-12-2	C00334	C4H9NO2	Amino acids	0.0001504	0.000156869	0.339461	0.88262
Methyl jasmonate	39924-52-2	C11512	C13H20O3	Phytohormone	0.000186812	0.000232904	1.22805	0.157196
5-Hydroxylysine	1190-94-9	C16741	C6H14N2O3	Amino acids	4.93316e-05	4.55425e-05	0.0844947	0.793323
Indole-3-carboxaldehyde	487-89-8	C08493	C9H7NO	Phytohormone	0.000583085	0.000516867	0.713442	0.668698
Hyperoside	482-36-0	C10073	C21H20O12	Flavonoids	0.00187008	0.000831573	1.8009	0.00204715
Isoquercitrin	482-35-9	C05623	C21H20O12	Flavonoids	0.000177935	0.000136735	0.752625	0.338648
Genistin	529-59-9		21H20O10	Flavonoids	0.000123324	0.000227513	1.40124	0.116737
Vitexin	3681-93-4	C01460	C21H20O10	Flavonoids	0.00702802	0.0050843	1.19465	0.136073
1-Methy-L-histidine	332-80-9	C01152	C7H11N3O2	Amino acids	5.13913e-05	5.27814e-05	0.435956	0.937097
3-Methy-L-histidine	368-16-1	C01152	C7H11N3O2	Amino acids	0.00017225	0.000173649	0.171842	0.969576
3-Indolebutyric acid	133-32-4	C11284	C12H13NO2	Phytohormone	0.000117035	9.87365e-05	0.674206	0.443871
cis-Zeatin	32771-64-5	C15545	C10H13N5O	Phytohormone	3.74041e-05	4.62641e-05	0.745423	0.472596
isoliquiritigenin	961-29-5	C08650	C15H12O4	Flavonoids	5.92231e-05	5.7341e-05	0.232061	0.833025
Chalconaringenin	73692-50-9	C06561	C15H12O5	Flavonoids	5.826e-05	3.51552e-05	1.50653	0.0960474
Phloretin	60-82-2	C00774	C15H14O5	Flavonoids	5.5887e-05	4.24553e-05	0.827548	0.302541
Fisetin	528-48-3	C01378	C15H12O6	Flavonoids	4.0979e-05	4.04661e-05	0.392209	0.976299
Cianidanol	18829-70-4	C06562	C15H14O6	Flavonoids	2.41951e-05	2.09033e-05	0.444525	0.707587
Tectorigenin	548-77-6	C10534	C16H12O6	Flavonoids	4.40819e-05	0.000548706	0.835926	0.218599
Taxifolin	480-18-2	C01617	C15H12O7	Flavonoids	0.000271205	0.000234399	0.564893	0.461952
Gallocatechin	970-73-0	C12127	C15H14O7	Flavonoids	7.54837e-05	5.09619e-05	1.00383	0.200876
Ononin	486-62-4	C10509	C22H22O9	Flavonoids	0.0195162	0.0154322	1.23637	0.138462
Myricetin	529-44-2	C10107	C15H10O8	Flavonoids	6.18363e-05	5.37577e-05	0.115746	0.672835
Dihydromyricetin	27200-12-0	C02906	C15H12O8	Flavonoids	0.000147631	0.000450135	1.61409	0.0622012
Baicalin	21967-41-9	C10025	C21H18O11	Flavonoids	0.000175207	0.000110156	1.87824	0.0117096
Glycitin	40246-10-4	C16195	C22H22O10	Flavonoids	4.9373e-05	8.59549e-05	0.939164	0.203021
Astragalin	480-10-4	C12249	C21H20O11	Flavonoids	0.0272016	0.00955714	2.36618	0.00628403
Homoorientin	4261-42-1	C01821	C21H20O11	Flavonoids	0.00360152	0.00143775	2.39991	0.000294682
Apiin	26544-34-3	C04858	C26H28O14	Flavonoids	6.45908e-05	2.79639e-05	1.69311	0.134419
Rhoifolin	17306-46-6	C12627	C27H30O14	Flavonoids	0.00235435	0.00220197	0.298171	0.790357
Kaempferol-3-O-rutinoside	17650-84-9	C21833	C27H30O15	Flavonoids	0.000636287	0.000395044	0.606238	0.226494
Diosmin	520-27-4	C10039	C28H32O15	Flavonoids	0.00877147	0.00643144	1.9541	0.00922012
L-Valine	72-18-4	C00183	C5H11NO2	Amino acid and derivatives; amino acids	0.00613219	0.00818387	1.90307	0.0147571
L-Threonine	72-19-5	C00188	C4H9NO3	Amino acid and derivatives; amino acids	0.00356039	0.00404968	1.01809	0.210715
Proline;L-Proline	147-85-3	C00148	C5H9NO2	Amino acid and derivatives; amino acids	0.0851961	0.0825454	0.332539	0.784532
L-Serine	56-45-1	C00065	C3H7NO3	Amino acid and derivatives; amino acids	0.00561013	0.00670864	1.46616	0.0795189
L-Arginine	74-79-3	C00062	C6H14N4O2	Amino acid and derivatives; amino acids	0.0180888	0.0206531	1.05858	0.212457
L-Asparagine	70-47-3	C00152	C4H8N2O3	Amino acid and derivatives; amino acids	0.003075	0.00751209	2.21193	0.0218556
L-Ornithine	70-26-8	C01602; C00077	C5H12N2O2	Amino acid and derivatives; amino acids	0.000983142	0.00154994	0.246007	0.239738
L-Aspartic acid	56-84-8	C00049	C4H7NO4	Amino acid and derivatives; amino acids	0.00965396	0.00780566	1.73986	0.0212928
L-Citruline;L-Citrulline	372-75-8	C00327	C6H13N3O3	Amino acid and derivatives; amino acids	0.00240873	0.00227429	0.30776	0.783966
L-Glutamic acid	56-86-0	C00025	C5H9NO4	Amino acid and derivatives; amino acids	0.117669	0.114093	0.498565	0.586844
L-Histidine	71-00-1	C00135	C6H9N3O2	Amino acid and derivatives; amino acids	0.00236906	0.00343783	1.68731	0.0345587
trans-4-Hydroxy-L-proline;4-Hydroxyproline	51-35-4	C01157	C5H9NO3	Amino acid and derivatives; amino acids	0.000350352	0.000316737	0.626854	0.540063
L-Alanine; DL-Alanine	56-41-7; 302-72-7	C00041; C01401	C3H7NO2	Amino acid and derivatives; Alkaloids; amino acids	0.00433568	0.00607375	1.67325	0.0261692
L-Lysine; L-Glutamine	56-87-1; 56-85-9	C00047; C00064	C6H14N2O2; C5H10N2O3	Amino acid and derivatives; amino acids	0.049496	0.0593454	0.975588	0.312372
Malic acid	6915-15-7; 97-67-6	C00149	C4H6O5	Hydroxy acids and derivatives	0.00189292	0.00102364	2.22909	0.0111986
L(-)-Malic acid	636-61-3	C00497	C4H6O5	Fatty Acyls	0.00189292	0.00102364	2.22909	0.0111986
6-Phosphogluconic acid	53411-70-4	C00345	C6H13O10P	Organooxygen compounds	0.000107862	7.20414e-05	1.76207	0.0336017
Fumaric acid	110-17-8	C00122	C4H4O4	Organic acids and derivatives	4.42956e-05	8.93184e-05	1.051	0.134985
1H-Indole-3-carboxylic acid; Indole-3-carboxylic	771-50-6	C19837	C9H7NO2	Alkaloids	8.56576e-06	1.07427e-05	0.377793	0.429701
Citric acid	77-92-9	C00158	C6H8O7	Organic acids	8.95283e-05	7.81278e-05	0.429124	0.601582
D-(-)-Quinic acid	77-95-2	C00296	C7H12O6	Quinolines and derivatives	4.94044e-05	5.82917e-05	0.653217	0.428852
Lipoic acid	1077-28-7; 62-46-4	C00725	C8H14O2S2	Organic acids and derivatives	4.35981e-05	2.91551e-05	0.0597646	0.40878
Biochanin A	491-80-5	C00814	C16H12O5	Flavonoids	9.01758e-05	1.14878e-05	1.38699	0.278585
Glycitein	40957-83-3	C14536	C16H12O5	Flavonoids	7.41067e-06	2.1442e-05	1.36208	0.0688676
Oleaside A	69686-84-6		C30H44O7	Steroids and steroid derivatives	0.000253472	0.000197545	1.1588	0.233534
Gamma-Tocotrienol	14101-61-2	C14155	C28H42O2	Phenols	0.000443832	0.000347667	1.49205	0.0613366
Salidroside	10338-51-9	C06046	C14H20O7	Phenols	0.000151803	0.00011161	1.31763	0.150582
O-Phosphorylethanolamine	1071-23-4	C00346	C2H8NO4P	Miscellaneous	0.000774548	0.000719834	0.24748	0.576897
myo-Inositol	87-9-8; 87-89-8	C00137	C6H12O6	Organooxygen compounds	0.000347962	0.000275702	0.787769	0.454584
D-Glucose 6-phosphate; Glucose 6-phosphate	56-73-5	C00092	C6H13O9P	Carbohydrates	0.0108274	0.00677739	2.36347	0.000431462
Galactose 1-phosphate	2255-14-3	C00446; C03384	C6H13O9P	Organooxygen compounds	0.0110844	0.00723291	2.47316	4.69892e-05
cis-4-Hydroxy-D-proline	2584-71-6	C03440	C5H9NO3	Amino acid and derivatives	0.00014683	0.000227711	1.5822	0.0673011
Malvidin 3-O-glucoside (Oenin); Malvidin 3-glucoside	18470-06-9	C12140	C23H24O12	Flavonoids	0.00241142	0.00210143	1.23774	0.178637
3,4-Dihydroxymandelic acid	775-01-9	C05580	C8H8O5	Phenols	9.16683e-05	7.74675e-05	0.844119	0.387493
L-Glutamine	56-85-9	C00064	C5H10N2O3	Amino acid and derivatives	0.00190171	0.00228657	1.09795	0.284371
Clavulanate	58001-44-8	C06662	C8H9NO5	Carboxylic acids and derivatives	3.25044e-05	2.78555e-05	0.343977	0.550555
Azacitidine	320-67-2	C11262	C8H12N4O5	Organooxygen compounds	0.00046546	0.000471567	0.327165	0.946384
Melibiose	585-99-9	C05402	C12H22O11	Carbohydrates	4.71391e-05	4.27303e-05	0.0797234	0.857085
D-Maltose	69-79-4	C00208	C12H22O11	Carbohydrates	0.0738477	0.0648026	0.960388	0.255439
D-Ribose	50-69-1	C00121	C5H10O5	Carbohydrates	7.57798e-05	6.53848e-05	0.889963	0.619376
D-Arabinose	10323-20-3	C00216	C5H10O5	Miscellaneous	7.17674e-05	6.53848e-05	0.610018	0.770434
Tartaric acid	87-69-4	C00898	C4H6O6	Miscellaneous	0.000337626	0.000335895	0.283399	0.986323
Glutaric acid	110-94-1	C00489	C5H8O4	Organic acids and derivatives	0.000140636	0.000116743	1.21017	0.149209
4-Hydroxybenzoic acid	99-96-7	C00156	C7H6O3	Phenols	0.000877281	0.000803892	0.508063	0.514885
Gentisic acid	490-79-9	C00628	C7H6O4	Phenols	6.55312e-05	0.000162435	1.93412	0.00276554
Shikimic acid	138-59-0	C00493	C7H10O5	Organic acids and derivatives	0.00432277	0.00404936	0.624242	0.485598
ESCULETIN	305-01-1	C09263	C9H6O4	Coumarins	0.00012978	0.000121282	0.201786	0.72367
Deoxycytidine	951-77-9	C00881	C9H13N3O4	Nucleotide and its derivates	5.78969e-05	9.60681e-05	1.40131	0.0583309
Gluconic acid	526-95-4	C00257	C6H12O7	Carbohydrates	0.00388981	0.00294434	1.90385	0.0107798
Cytidine 5'-monophosphate (Cytidylic acid)	63-37-6	C00055	C9H14N3O8P	Nucleotide and its derivates	6.83945e-05	6.66633e-05	0.305196	0.927274
Uridine 5'-monophosphate	58-97-9	C00105	C9H13N2O9P	Nucleotide and its derivates	0.00152915	0.00174576	0.808645	0.42559
Tiglic acid	80-59-1	C08279	C5H8O2	Miscellaneous	0.000527185	0.00183588	1.30257	0.120411
Inosine 5'-monophosphate;Inosinic acid	131-99-7	C00130	C10H13N4O8P	Nucleotide and its derivates	0.000117245	9.91249e-05	0.382979	0.767452
Uridine 5'-diphospho-D-glucose; UDP-D-galactose; Uridine diphosphategalactose	133-89-1; 2956-16-3	C00029; C00052	C15H24N2O17P2	Nucleotide and its derivates; Pyrimidine nucleotides	0.00165588	0.00131447	0.876128	0.302407
D-glucoronic acid; D-Galacturonic acid	6556-12-3; 6294-16-2; 685-73-4	C00191; C16245; C00333	C6H10O7	Carbohydrates; Organic acids	0.000260466	0.000244867	0.449132	0.709748
Trigonelline	535-83-1	C01004	C7H7NO2	Alkaloids	0.0204198	0.030735	1.05757	0.0983208
Anthranilic acid	118-92-3	C00108	C7H7NO2	Benzoic acid derivatives	5.02237e-05	4.66019e-05	0.339716	0.763347
p-Aminobenzoate	150-13-0	C00568	C7H7NO2	Benzoic acid derivatives	0.00480188	0.0060729	1.19767	0.163496
Tyramine	51-67-2	C00483	C8H11NO	Amino acid and derivatives	0.000127414	0.000135562	0.403567	0.687249
Betaine aldehyde	7418-61-3	C00576	C5H11NO	Organonitrogen compounds	0.000214043	0.000316387	1.35411	0.128301
Dihydrotestosterone	521-18-6	C03917	C19H30O2	Steroids and steroid derivatives	4.52476e-05	4.28796e-05	0.169406	0.897107
Epiandrosterone	481-29-8	C07635	C19H30O2	Steroids and steroid derivatives	3.15754e-05	3.44945e-05	0.112093	0.875304
Trimethoprim	738-70-5	C01965	C14H18N4O3	Phenol ethers	8.02847e-05	5.64026e-05	0.613658	0.363209
Epitulipinolide	24164-13-4	C09566	C17H22O4	Sesquiterpenoids	4.97e-05	3.41224e-05	1.03403	0.35817
Gastrodin	62499-27-8	C16964	C13H18O7	Phenols	7.1577e-05	0.000102617	1.28178	0.208649
Luteolin	491-70-3	C01514	C15H10O6	Flavonoids	0.000145531	7.61805e-05	1.84621	0.0408807
Kaempferol	520-18-3	C05903	C15H10O6	Flavonoids	2.73712e-05	1.80366e-05	0.84512	0.284035
Isosakuranetin	480-43-3	C05334	C16H14O5	Flavonoids	0.000261196	8.04397e-05	1.25254	0.0644227
Brazilin	474-07-7	C09920	C16H14O5	Flavonoids	6.98604e-05	4.67384e-05	1.18981	0.134854
2',3,5,7-Tetrahydroxyflavone	480-15-9	C10036	C15H10O6	Flavonoids	5.73447e-05	4.80549e-05	0.483922	0.530462
Scutellarein	529-53-3	C10184	C15H10O6	Flavonoids	3.12999e-05	3.65375e-05	0.256013	0.722981
Citreorosein	481-73-2	C17810	C15H10O6	Anthraquinones	3.74152e-05	4.82873e-05	1.31311	0.150596
(-)-Sativan	41743-86-6	C10526	C17H18O4	Flavonoids	1.47379e-05	1.63435e-05	0.378858	0.790353
4-Hydroxyphenyl-2-propionic acid	938-96-5	C03080	C9H10O3	Phenylpropanoic acids	5.07751e-05	7.2146e-05	0.75206	0.385595
L-3-Phenyllactic acid	20312-36-1; 7326-19-4	C05607	C9H10O3	Phenylpropanoic acids	0.000100362	9.05203e-05	0.439576	0.50419
7-Methylxanthine	552-62-5	C16353	C6H6N4O2	Nucleotide and its derivates	2.99614e-05	2.57583e-05	0.390946	0.70849
Cytosine	71-30-7	C00380	C4H5N3O	Nucleotide and its derivates	0.000459595	0.000884691	0.974903	0.325997
Betaine	590-46-5; 107-43-7	C00719	C5H11NO2	Alkaloids	0.0431607	0.0569078	1.02421	0.269442
Phenylacetonitrile	140-29-4	C16074	C8H7N	Benzene and substituted derivatives	6.29497e-05	4.97857e-05	0.624993	0.372064
5-Aminovaleric acid	660-88-8	C00431	C5H11NO2	Amino acid and derivatives	0.0129093	0.0162911	0.927946	0.216027
Guanidineacetic acid	352-97-6	C00581	C3H7N3O2	Amino acid and derivatives	0.00014221	0.000125596	0.685014	0.41032
Aminomalonic acid	1068-84-4	C00872	C3H5NO4	Organic acids	0.00044963	0.000531191	1.05701	0.201107
D-Proline	344-25-2	C00763	C5H9NO2	Carboxylic acids and derivatives	0.0851961	0.0825454	0.332539	0.784532
Maltol	118-71-8	C11918	C6H6O3	Flavonoids	0.00501788	0.00498177	0.141641	0.895931
Toluene-cis-dihydrodiol	41977-20-2	C04592	C7H10O2	polyol	5.24332e-05	7.03153e-05	1.1554	0.193895
5-Hydroxymethylfurfural	67-47-0	C11101	C6H6O3	Carbonyl compounds	0.000286296	0.000188457	2.12319	0.00476709
2-Hydroxyethanesulfonate	107-36-8	C05123	C2H6O4S	Organic acids	0.000401851	0.00035397	0.8486	0.358857
D-alpha-Aminobutyric acid	2623-91-8	C02261	C4H9NO2	Carboxylic acids and derivatives	0.451616	0.431654	0.5907	0.536234
N,N-Dimethylglycine	1118-68-9	C01026	C4H9NO2	Amino acid and derivatives	0.0598383	0.0514408	1.51827	0.0701702
2-Aminoisobutyric acid	62-57-7	C03665	C4H9NO2	Amino acid and derivatives	0.0598383	0.0514408	1.51827	0.0701702
3-Aminoisobutanoic acid	144-90-1	C05145	C4H9NO2	Amino acid and derivatives	0.00116623	0.000910027	0.926763	0.201405
O-Acetylethanolamine	1854-30-4		C4H9NO2	Alkaloids	0.160358	0.153368	0.639803	0.485737
S-(5'-Adenosy)-L-homocysteine	979-92-0	C00021	C14H20N6O5S	Amino acid and derivatives	0.000136559	6.41426e-05	1.47347	0.0204152
Phendimetrazine	634-03-7	C07904	C12H17NO	Oxazinanes	0.000109638	9.09098e-05	0.98354	0.330149
3-Hydroxybenzoic acid	99-06-9	C00587	C7H6O3	Phenols	6.97407e-05	7.46227e-05	0.166798	0.761456
2,5-Dihydroxybenzaldehyde	1194-98-5	C05585	C7H6O3	Phenols	0.000171224	0.000151839	0.274635	0.636618
3,4-Dihydroxybenzaldehyde; Protocatechuic aldehyde; 3,4-Dihydroxybenzaldehyde	139-85-5	C16700	C7H6O3	Phenols	0.00380717	0.0026359	1.28158	0.156172
3-Ethyl-1,2-benzenediol	933-99-3	C06728	C8H10O2	Phenols	0.00221143	0.0036235	1.50585	0.0368645
1,2-Dimethoxybenzene	91-16-7		C8H10O2	Phenols	0.00026736	0.000243315	0.563683	0.567573
Ursodeoxycholic acid	128-13-2	C07880	C24H40O4	Steroids	0.000243401	0.000256679	0.00110467	0.873561
D-Serine	312-84-5	C00740	C3H7NO3	Alkaloids	0.00561013	0.00670864	1.46616	0.0795189
Adenosine	58-61-7	C00212	C10H13N5O4	Nucleotide and its derivates	0.0864568	0.118871	0.399685	0.684806
Uridine	58-96-8	C00299	C9H12N2O6	Nucleotide and its derivates	0.00197151	0.00226915	0.828014	0.565901
Panaxynol	81203-57-8	C17447	C17H24O	Miscellaneous	0.0002828	0.000267385	0.326072	0.762006
2-Hydroxycinnamic acid	583-17-5; 614-60-8	C01772	C9H8O3	Phenylpropanoids	4.05575e-05	6.21778e-05	1.23802	0.0977654
4-Isopropylbenzoic acid	536-66-3	C06578	C10H12O2	Prenol lipids	9.23511e-05	5.60419e-05	1.63546	0.0334603
Enol-phenylpyruvate	5801-57-0	C02763	C9H8O3	Benzene and substituted derivatives	0.000301198	0.000249405	0.745264	0.403853
Ethyl phenylacetate	101-97-3		C10H12O2	Phenols	0.00608562	0.00649378	0.207251	0.814196
Cinnamic acid	621-82-9	C10438	C9H8O2	Cinnamic acids and derivatives	9.07136e-05	9.0137e-05	0.0802499	0.980075
4-Isopropylbenzaldehyde	122-03-2	C06577	C10H12O	Phenols	0.00026794	0.000230391	0.706741	0.515777
3,4-Dihydrocoumarin	119-84-6	C02274	C9H8O2	Coumarins	0.000218161	0.000246017	0.496089	0.583613
Methyl anthranilate	134-20-3	C20634	C8H9NO2	Alkaloids	0.000356518	0.000364574	0.117062	0.937776
5-oxoproline	98-79-3	C01879	C5H7NO3	Amino acid and derivatives	0.000433605	0.000408954	0.527244	0.751439
Leukoaminochrome	29539-03-5	C17756	C8H9NO2	Indoles and derivatives	0.00015448	0.000158695	0.0459138	0.937334
Phosphoric acid	7664-38-2	C00009	H3O4P	Organic acids	0.103804	0.109447	0.375629	0.697784
Tryptamine	61-54-1	C00398	C10H12N2	Tryptamine derivatives	0.000250673	0.00040228	0.616276	0.373803
Pimelic acid	111-16-0	C02656	C7H12O4	Fatty Acyls	0.0021586	0.00221854	0.0871607	0.871868
3-Octyl alcohol	589-98-0	C17144	C8H18O	Miscellaneous	0.00012507	0.000195226	1.77907	0.0270897
2-Phenylacetamide	103-81-1	C02505	C8H9NO	Benzene and substituted derivatives	0.00708222	0.00362994	0.1185	0.628261
Adenine	73-24-5	C00147	C5H5N5	Nucleotide and its derivates	0.00708222	0.00835693	0.370556	0.877738
6-hydroxynicotinic acid	5006-66-6	C01020	C6H5NO3	Nicotinic acid derivatives	4.26818e-05	2.53393e-05	0.784963	0.201674
3-Hydroxypicolinic acid	874-24-8	C18620	C6H5NO3	Pyridines and derivatives	6.69444e-05	3.12136e-05	1.21567	0.191465
N-Acetyl-L-glutamate 5-semialdehyde	13074-21-0	C01250	C7H11NO4	Carboxylic acids and derivatives	5.34913e-05	5.30368e-05	0.189034	0.968641
(2S,5S)-trans-Carboxymethylproline		C17366	C7H11NO4		0.000357438	0.000405565	0.826518	0.545207
1,2,5,6-Tetrahydro-4H-pyrrolo[3,2,1-ij]quinolin-4-one	57369-32-1	C18487	C11H11NO	Quinolines and derivatives	0.000100032	8.60302e-05	0.580359	0.420911
4-Sulfobenzoate	636-78-2	C02236	C7H6O5S		0.000199598	0.000259641	1.19819	0.200846
Vasicinone	486-64-6	C10744	C11H10N2O2	Alkaloids	6.13485e-05	2.6881e-05	1.36467	0.0840817
Demethoxyencecalin	19013-07-1		C13H14O2	Phenols	0.000288612	0.000291843	0.1803	0.970109
Alpha-caryophyllene	6753-98-6	C09684	C15H24	Sesquiterpenoids	0.000958463	0.00100288	0.0181555	0.804491
trans-Caryophyllene	87-44-5	C09629	C15H24	Sesquiterpenoids	0.000214463	0.000160819	0.969406	0.270802
N5-(L-1-Carboxyethyl)-L-ornithine	104537-93-1	C04210	C8H16N2O4	Amino acid related compounds	6.69938e-05	0.000114449	1.5263	0.0472959
CYS-GLY;Cysteinylglycine	19246-18-5	C01419	C5H10N2O3S	Amino acid and derivatives	0.000283996	0.000195523	1.19713	0.212405
Coniferylaldehyde	458-36-6	C02666	C10H10O3	Phenylpropanoids	0.000298121	0.000238005	0.53652	0.429565
Mellein	480-33-1		C10H10O3	Coumarins	6.84541e-05	3.76693e-05	1.8874	0.0136366
Phosphorylcholine	107-73-3	C00588	C5H14NO4P	Cholines	0.0296703	0.0299343	0.0428207	0.924897
2-Keto-6-acetamidocaproate		C05548	C8H13NO4	Keto acids and derivatives	8.41164e-05	9.17292e-05	0.496575	0.607759
N-Acetyl-L-glutamic acid	1188-37-0	C00624	C7H11NO5	Amino acid and derivatives	7.00433e-05	5.33358e-05	0.859855	0.436752
L-Homocitrulline	1190-49-4	C02427	C7H15N3O3	Amino acid and derivatives	0.000124311	0.000145893	0.313323	0.565987
Kynurenic acid	492-27-3	C01717	C10H7NO3	Alkaloids	0.00381405	0.00381089	0.356552	0.998237
3-Dehydroquinate	10534-44-8	C00944	C7H10O6	Alcohols and polyols	4.42775e-05	4.93855e-05	0.532081	0.735868
7-Ethoxycoumarin	31005-02-4	C11052	C11H10O3	Coumarins	2.88756e-05	2.38653e-05	0.0298456	0.583785
Ligustilide	4431-01-0	C16987	C12H14O2	Miscellaneous	3.27058e-05	3.82122e-05	0.394825	0.523853
Altechromone A	38412-47-4		C11H10O3	Phenols	4.11698e-05	2.95991e-05	0.8308	0.271299
Cantharidin	56-25-7	C16778	C10H12O4	Monoterpenoids	0.000121411	9.77745e-05	0.862201	0.328664
Geranylacetate	105-87-3	C09861	C12H20O2	Monoterpenoids	0.000290295	0.000223636	0.927393	0.281657
Bornyl acetate	5655-61-8	C09837	C12H20O2	Monoterpenoids	4.58489e-05	4.57668e-05	0.327809	0.992629
3-(3,4-Dihydroxy-5-methoxy)-2-propenoic acid	2041-35-2	C05619	C10H10O5	Cinnamic acids and derivatives	0.000103195	8.87949e-05	0.621731	0.532173
Lactaroviolin	85-33-6	C09696	C15H14O	Prenol lipids	6.74528e-05	7.49275e-05	0.539824	0.734361
Flavone	525-82-6	C15608; C10043	C15H10O2	Flavonoids	3.89288e-05	3.28864e-05	0.400442	0.401786
Isofraxidin	486-21-5	C17480	C11H10O5	Phenylpropanoids	5.27915e-05	5.98636e-05	0.420388	0.598879
Azithromycin	83905-01-5	C06838	C38H72N2O12	Organooxygen compounds	0.000114863	9.12737e-05	1.10084	0.37842
2-Benzal-4-hydroxyacetophenone	2657-25-2	C14232	C15H12O2	Flavonoids	0.000243419	0.000159273	1.64432	0.0520548
2,3-Dihydro-2-phenyl-4H-benzopyran-4-one	487-26-3	C02099	C15H12O2	Flavonoids	0.000276337	0.000227896	0.480404	0.731973
3,4,5-Trimethoxycinnamyl alcohol	30273-62-2		C12H16O4	Phenylpropanoids	0.000142862	0.000109631	0.915567	0.307213
N'-Formylkynurenine	1022-31-7	C02700	C11H12N2O4	Amino acid and derivatives	9.43058e-05	9.85916e-05	0.210811	0.793742
Thymidine	50-89-5	C00214	C10H14N2O5	Nucleotide and its derivates	6.01429e-05	4.91114e-05	0.798881	0.473715
4',7-Isoflavandiol	531-95-3	C14131	C15H14O3	Flavonoids	0.00028055	0.000166181	1.37957	0.074014
Lumichrome	1086-80-2	C01727	C12H10N4O2	Alkaloids	3.85643e-05	1.54181e-05	1.418	0.117846
Cytidine	65-46-3	C00475	C9H13N3O5	Nucleotide and its derivates	0.00122853	0.00138706	0.81153	0.452591
5'-Deoxyadenosine	4754-39-6	C05198	C10H13N5O3	Nucleotide and its derivates	5.30521e-05	4.02445e-05	1.01857	0.286072
Cordycepin	73-03-0	C08431	C10H13N5O3	Nucleotide and its derivates	7.29585e-05	5.7143e-05	1.133	0.493886
Apigenin	520-36-5	C01477	C15H10O5	Flavonoids	0.000534458	0.000446798	0.89822	0.384988
Alloimperatorin	642-05-7	C09053	C16H14O4	Coumarins	6.72506e-05	7.5259e-05	0.152543	0.758899
Genistein	446-72-0	C06563	C15H10O5	Flavonoids	6.10523e-05	3.9041e-05	1.34556	0.161329
Baicalein	491-67-8	C10023	C15H10O5	Flavonoids	2.74449e-05	2.44024e-05	0.50214	0.634057
3',4',7-Trihydroxyisoflavone	485-63-2	C14313	C15H10O5	Flavonoids	7.61212e-05	3.2595e-05	2.15301	0.01238
Norwogonin	4443-09-8	C10113	C15H10O5	Flavonoids	0.000130816	0.000340994	2.31339	0.00309975
Naringenin	480-41-1	C00509	C15H12O5	Flavonoids	0.000229756	0.000137435	1.54514	0.0812594
Vestitol	35878-41-2	C16225	C16H16O4	Flavonoids	2.74944e-05	3.46397e-05	0.381806	0.555635
Butein	487-52-5	C08578	C15H12O5	Chalcones	4.87826e-05	4.42689e-05	0.218769	0.608993
Garbanzol	1226-22-8	C09751	C15H12O5	Flavonoids	5.96874e-05	7.18415e-05	0.234272	0.716243
Cinchonine	118-10-5	C06528	C19H22N2O	Alkaloids	0.000379281	0.000338865	0.783179	0.709224
(10E,12Z)-(9S)-9-Hydroperoxyoctadeca-10,12-dienoic acid	29774-12-7	C14827	C18H32O4	Fatty Acyls	0.000211161	0.00025344	0.562378	0.504572
13-HPODE; 13-L-Hydroperoxylinoleic acid	33964-75-9	C04717	C18H32O4	Lipids	0.000211161	0.00025344	0.562378	0.504572
Colneleate	52761-34-9	C19827	C18H30O3	Fatty Acyls	0.000210019	0.000142327	1.38619	0.13847
(-)-Cinchonidine	485-71-2	C11379	C19H22N2O	Alkaloids	0.000761879	0.000762037	0.0678548	0.998872
6-Gingerol; 6-Gingerol; [6]-Gingerol; Gingerol	58253-27-3; 23513-14-6	C10462	C17H26O4	Phenols	0.000240368	0.000154236	0.681047	0.374219
5'-S-Methyl-5'-thioadenosine	2457-80-9	C00170	C11H15N5O3S	Nucleotide and its derivates	0.0158756	0.0138614	1.33514	0.0967703
Uracil	66-22-8	C00106	C4H4N2O2	Nucleotide and its derivates	4.59116e-05	5.65441e-05	1.05339	0.236956
Sphingosine	123-78-4	C00319	C18H37NO2	Organonitrogen compounds	0.000147424	0.000110809	0.76001	0.422412
N-Acetyl-D-glucosamine 6-phosphate	1746-32-3	C00357	C8H16NO9P	Organooxygen compounds	0.000323623	0.000375009	0.791496	0.489789
Oxymorphone	76-41-5	C08019	C17H19NO4	Phenanthrenes and derivatives	0.00644646	0.00667058	0.376551	0.800865
Quercetin	117-39-5	C00389	C15H10O7	Flavonoids	1.86441e-05	2.47331e-05	0.907386	0.378853
Delphinidin	528-53-0	C05908	C15H10O7	Flavonoids	8.02031e-05	9.00817e-05	0.674889	0.552394
Robinetin	490-31-3	C10177	C15H10O7	Flavonoids	3.99967e-05	5.7944e-05	0.991452	0.202333
Lupeol	545-47-1	C08628	C30H50O	Triterpenoids	0.000170504	0.000115491	1.0385	0.224032
Shionone	10376-48-4	C17966	C30H50O	Triterpenoids	0.000340259	0.000335863	0.210516	0.964669
Cycloeucalenol	469-39-6	C02141	C30H50O	Triterpenoids	0.000120154	0.000132314	0.433692	0.577035
Adenosine 5'-monophosphate	61-19-8	C00020	C10H14N5O7P	Nucleotide and its derivates	0.0341699	0.0284479	1.13798	0.142459
Evoxine	522-11-2	C10670	C18H21NO6	Alkaloids	7.52699e-05	4.97822e-05	0.840233	0.302234
Acetic acid m-cresyl ester	122-46-3		C9H10O2	Phenols	3.34767e-05	3.27254e-05	0.181783	0.928516
2-Methoxy-4-vinylphenol	7786-61-0	C17883	C9H10O2	Phenols	0.000215871	0.000186981	0.743858	0.32078
Perillyl aldehyde	2111-75-3	C02576	C10H14O	Prenol lipids	0.000172611	0.000145102	0.57814	0.49181
(R)-Menthofuran	494-90-6	C09868	C10H14O	Prenol lipids	8.22393e-05	0.000106762	0.987495	0.225007
2-Carboxybenzaldehyde	119-67-5	C03057	C8H6O3	Phenols	5.72412e-05	9.805e-05	1.83851	0.0219638
1-(4-Hydroxyphenyl)propan-1-one	70-70-2	C13342	C9H10O2	Phenylpropanoids	7.49256e-05	7.76838e-05	0.102459	0.880521
p-Coumaryl alcohol	3690-05-9	C02646	C9H10O2	Phenylpropanoids	6.90335e-05	7.25613e-05	0.341521	0.877958
Octadecanamide	124-26-5	C13846	C18H37NO	Fatty Acyls	0.00204286	0.00164434	1.22324	0.138367
20-HETE	79551-86-3	C14748	C20H32O3	Fatty Acyls	0.000177811	0.000115408	1.61819	0.0375239
Kirenol	52659-56-0		C20H34O4	Diterpenoids	0.00147828	0.0011301	0.0786112	0.331659
Anisatin	5230-87-5	C09294	C15H20O8	Sesquiterpenoids	0.000872451	0.000321459	2.47145	0.00152145
Anwulignan	107534-93-0		C20H24O4	Lignans	8.52151e-05	6.32725e-05	0.988999	0.472055
Adenosine 2',3'-cyclic phosphate	634-01-5	C02353	C10H12N5O6P	Purine nucleotides	5.98792e-05	5.16572e-05	0.510545	0.761925
Deoxycorticosterone	64-85-7	C03205	C21H30O3	Steroids and steroid derivatives	1.35652e-05	1.13454e-05	0.960128	0.431097
Tricin	520-32-1	C10193	C17H14O7	Flavonoids	0.00150872	0.000905004	2.10493	0.00855058
Aurantio-obtusin	67979-25-3	C17670	C17H14O7	Anthraquinones	0.000147799	0.000147507	0.140192	0.992067
Picrocrocin	138-55-6	C17055	C16H26O7	Monoterpenoids	0.000127076	8.75337e-05	1.08046	0.157895
beta-Nicotinamide mononucleotide	1094-61-7	C00455	C11H15N2O8P	Nucleotide and its derivates	0.0085094	0.00690579	0.632806	0.316704
Cedeodarin	31076-39-8	C09770	C16H14O8	Flavonoids	6.54226e-05	6.2089e-05	0.0609805	0.871639
Senecionine	130-01-8	C06176	C18H25NO5	Alkaloids	7.22881e-05	7.07562e-05	0.0272278	0.946316
Triangularine	87340-27-0	C10410	C18H25NO5	Alkaloids	0.0102525	0.00912855	0.775289	0.459954
5(S)-HPETE	70968-82-0	C05356	C20H32O4	Fatty Acyls	7.35244e-05	0.000114459	1.03737	0.188729
8(R)-HPETE		C04822	C20H32O4		0.000426215	0.000636735	0.978593	0.251105
Psoralidin	18642-23-4	C10523	C20H16O5	Coumarins	0.00227954	0.0017208	1.22714	0.138476
Sarracine	2492-09-3	C10383	C18H27NO5	Alkaloids	0.0310329	0.0236113	1.33785	0.106986
3alpha,6beta-Ditigloyloxytropan-7beta-ol	7159-86-6		C18H27NO5	Alkaloids	0.0310329	0.0236113	1.33785	0.106986
AICAR	3031-94-5	C04677	C9H15N4O8P	Imidazole ribonucleosides and ribonucleotides	0.00135258	0.00103679	0.848446	0.25012
Wighteone	51225-30-0	C10542	C20H18O5	Flavonoids	0.000160835	0.000895853	1.03826	0.192274
8-Geranyloxypsoralen	7437-55-0		C21H22O4	Coumarins	0.00364286	0.00273092	1.01005	0.227264
Demethoxycurcumin	22608-11-3	C17742	C20H18O5	Phenols	0.000691013	6.04702e-05	1.49248	0.173698
Bergamotine	7380-40-7	C22152	C21H22O4	Coumarins	7.89412e-05	7.129e-05	0.495155	0.765876
Methyl tanshinonate	18887-19-9		C20H18O5	Diterpenoids	8.14883e-05	7.83955e-05	0.366337	0.867363
Benzyl formate	104-57-4	C05613	C8H8O2	Benzene and substituted derivatives	0.000393748	0.00025678	0.741415	0.35147
4-Propylphenol	645-56-7	C14311	C9H12O	Benzene and substituted derivatives	0.000449449	0.00025678	1.08577	0.195194
Hypoxanthine	68-94-0	C00262	C5H4N4O	Nucleotide and its derivates	0.000880081	0.0007349	0.314734	0.54916
3-Carbamyl-1-methylpyridinium (1-Methylnicotinamide)	3106-60-3	C02918	C7H8N2O	Pyridines and derivatives	0.00168199	0.00110132	1.49307	0.0763702
Myrcene	123-35-3	C06074	C10H16	Monoterpenoids	0.000242875	0.000210844	0.779667	0.687069
3-Methylsalicylaldehyde	824-42-0	C14087	C8H8O2	Benzaldehyde	0.000165313	0.000151683	0.326854	0.63825
2-Methylbenzoic acid	118-90-1	C07215	C8H8O2	Benzene and substituted derivatives	0.00025151	0.000271518	0.485127	0.442239
Chrysophanol; Chrysophanic acid; Chrysophanol	481-74-3	C10315	C15H10O4	Anthraquinones	2.28275e-05	2.06843e-05	0.620748	0.729043
Daidzein	486-66-8	C10208	C15H10O4	Flavonoids	0.000197859	0.000309464	0.847222	0.150564
S-(Phenylacetothiohydroximoyl)-L-cysteine		C17237	C11H14N2O3S	Amino acid related compounds	0.0002215	0.000169068	0.807923	0.287436
7,8-Dihydroxyflavone	38183-03-8		C15H10O4	Flavonoids	3.38454e-05	4.5858e-05	0.746092	0.244073
Chalepensin	13164-03-9	C09165	C16H14O3	Coumarins	5.20064e-05	4.44165e-05	0.615338	0.464466
Erucic acid	112-86-7	C08316	C22H42O2	Fatty Acyls	0.0161953	0.0117413	1.51047	0.0618078
5,6-DHET	213382-49-1	C14772	C20H34O4	Fatty Acyls	2.22275e-05	2.81632e-05	0.462273	0.678592
Sterebin E	114343-74-7		C20H34O4	Diterpenoids	4.0412e-05	2.34026e-05	0.996167	0.227728
8,9-DiHETrE	192461-96-4	C14773	C20H34O4	Fatty Acyls	0.00213047	0.00256269	0.38842	0.771615
Guggulsterone E&Z	95975-55-6		C22H30O3	Steroids	6.07108e-05	4.14764e-05	0.132549	0.521429
beta-Lactose	5965-66-2	C01970	C12H22O11	Carbohydrates	7.90559e-05	5.7356e-05	1.16177	0.252767
Notopterol	88206-46-6	C17499	C21H22O5	Coumarins	0.000231084	0.000109453	1.4904	0.160258
Rosmarinic acid	537-15-5; 20283-92-5	C01850	C18H16O8	Phenylpropanoids	8.36231e-05	3.4906e-05	1.68891	0.0472238
Benzoic acid	65-85-0	C00180	C7H6O2	Phenols	0.000360131	0.000265685	0.485262	0.437585
Erythritol	149-32-6	C00503	C4H10O4	Miscellaneous	8.22972e-05	9.57289e-05	0.835329	0.38011
Nicotinamide	98-92-0	C00153	C6H6N2O	Alkaloids	0.00376675	0.00388994	0.410055	0.907555
3-Ethylphenol	620-17-7	C14386	C8H10O	Phenols	0.00100321	0.000555305	2.05923	0.00980553
2,4-Dimethylphenol	105-67-9	C14582	C8H10O	Phenols	0.000136356	9.91551e-05	1.14329	0.18898
13(S)-HPOT	67597-26-6	C04785	C18H30O4	Fatty acyls	0.00045432	0.000413562	0.578567	0.669146
Moracin C	69120-06-5		C19H18O4	Phenols	0.000297974	0.000192603	1.29844	0.121004
Sterebin A	107647-14-3		C18H30O4	Diterpenoids	0.000155434	0.000191548	0.54294	0.520274
Valechlorine	51771-49-4		C22H31ClO8	Iridoids	0.000107331	8.31289e-05	1.15246	0.521213
cis-Gondoic acid	5561-99-9	C16526	C20H38O2	Lipids	6.64916e-05	6.09048e-05	0.24226	0.679313
2-Hydroxybutanoic acid	3347-90-8	C05984	C4H8O3	Organic acids	0.00857113	0.0106601	0.784715	0.345949
4-Hydroxybutanoic acid	591-81-1	C00989	C4H8O3	Fatty Acyls	0.000280022	0.000364162	1.38026	0.119491
12,13-DHOME	263399-35-5	C14829	C18H34O4	Fatty Acyls	0.000299112	0.000284696	0.263683	0.840118
Maltotriose	1109-28-0	C01835	C18H32O16	Organooxygen compounds	0.00542649	0.0047483	0.776623	0.701786
1-Kestose	470-69-9	C03661	C18H32O16	Organooxygen compounds	0.000385961	0.000178639	1.84489	0.0327168
Physalin A	23027-91-0		C28H30O10	Steroids and steroid derivatives	0.000153213	0.000101282	0.642656	0.344579
Physalin G	76045-38-0		C28H30O10	Steroids and steroid derivatives	0.000153213	8.92879e-05	0.930809	0.253733
2-Isopropyl-3-oxosuccinate	1245945-28-1	C04236	C7H10O5	Keto acids and derivatives	4.42465e-05	8.22823e-05	1.32914	0.151144
Juglone	481-39-0	C03840	C10H6O3	Quinones	0.000101844	0.00010538	0.0287751	0.87998
L-Theanine	3081-61-6	C01047	C7H14N2O3	Amino acid and derivatives	0.000346617	0.000468816	0.403515	0.52071
Gramine	87-52-5	C08304	C11H14N2	Alkaloids	0.000219902	0.000224928	0.0895671	0.908921
6(1H)-Azulenone, 2,3-dihydro-1,4-dimethyl	71305-89-0		C12H14O	Miscellaneous	3.48045e-05	6.00873e-05	0.52438	0.16982
2'-Deoxyuridine;Deoxyuridine	951-78-0	C00526	C9H12N2O5	Nucleotide and its derivates	8.72424e-05	7.08761e-05	1.11998	0.220697
Canthaxanthin	514-78-3	C08583	C40H52O2	Prenol lipids	0.000188271	0.000122909	1.43075	0.109397
Cascaroside A	53823-08-8	C10307	C27H32O14	Anthraquinones	0.00177894	0.00129605	1.69427	0.0385578
Glucoliquiritin	93446-18-5		C27H32O14	Flavonoids	0.00177894	0.00129605	1.69427	0.0385578
Androstanediol	25126-76-5	C07632	C19H32O2	Steroids and steroid derivatives	5.18953e-05	4.10072e-05	0.591928	0.597608
12-OPDA	85551-10-6	C01226	C18H28O3	Fatty Acyls	7.70484e-05	7.38563e-05	0.0229036	0.885592
Prostaglandin I2	35121-78-9	C01312	C20H32O5	Fatty Acyls	0.00012504	8.10361e-05	0.122631	0.343102
Lansiumarin A	205115-73-7		C21H20O5	Coumarins	0.0002646	0.000229083	0.279908	0.579619
(13E)-11a-Hydroxy-9,15-dioxoprost-13-enoic acid	22973-19-9	C04654	C20H32O5	Fatty Acyls	7.34864e-05	8.67071e-05	0.109298	0.56949
4-O-alpha-D-Galactopyranuronosyl-D-galacturonic acid	5894-59-7	C02273	C12H18O13	Organooxygen compounds	0.000321336	0.000144384	2.15866	0.000745387
Daphnoretin	2034-69-7	C09216	C19H12O7	Coumarins	0.000578623	0.000456438	0.954748	0.370463
Savinin	493-95-8	C10880	C20H16O6	Lignans	0.000133555	2.2729e-05	0.565101	0.370468
20-COOH-Leukotriene B4	80434-82-8	C05950	C20H30O6	Fatty Acyls	5.77707e-05	7.67902e-05	0.17983	0.605006
5-Hydroxytryptophan	56-69-9	C01017	C11H12N2O3	Alkaloids	9.30496e-05	6.89538e-05	0.669736	0.314439
Caryophyllene oxide	1139-30-6	C16908	C15H24O	Sesquiterpenoids	0.000789382	0.000768127	0.145859	0.909981
L-Nicotine	54-11-5	C00745	C10H14N2	Alkaloids	0.000138454	0.000147598	0.418088	0.856597
Safrole	94-59-7	C10490	C10H10O2	Benzodioxoles	0.000155911	0.000195906	0.774697	0.358722
3-Hydroxycoumarin	939-19-5		C9H6O3	Coumarins	6.37767e-05	6.05027e-05	0.0927342	0.840926
Methyl cinnamate	103-26-4	C06358	C10H10O2	Phenylpropanoids	0.000257769	0.000276044	0.389051	0.770063
Allicin	539-86-6	C07600	C6H10OS2	Miscellaneous	6.81385e-05	7.35855e-05	0.432872	0.641813
4-Methoxycinnamaldehyde	1963-36-6	C10475	C10H10O2	Phenylpropanoids	1.92817e-05	1.72034e-05	0.385528	0.774703
1-Octacosanol	557-61-9	C08387	C28H58O	Miscellaneous	0.000882722	0.000797584	0.422561	0.668694
alpha-Cyperone	473-08-5	C17090	C15H22O	Sesquiterpenoids	0.000286278	0.000195321	1.17318	0.189196
Capsidiol	37208-05-2	C09627	C15H24O2	Prenol lipids	4.77464e-05	4.93737e-05	0.268248	0.928422
4-Methylumbelliferyl acetate	2747-05-9	C03837	C12H10O4	Coumarins	4.42438e-05	4.93184e-05	0.0801257	0.707807
Cyperotundone		C17501	C15H22O	Prenol lipids	0.000355728	0.000225805	1.57058	0.0601898
Astaxanthin	7542-45-2; 472-61-7	C08580	C40H52O4	Miscellaneous	4.29974e-05	4.43133e-05	0.693237	0.96398
Hesperidin	520-26-3	C09755	C28H34O15	Flavonoids	0.000219169	0.000192027	0.207777	0.700498
Neohesperidin	13241-33-3	C09806	C28H34O15	Flavonoids	0.000281993	0.000192027	1.71242	0.0697308
Sucrose	57-50-1	C00089	C12H22O11	Carbohydrates	0.165512	0.177984	0.617031	0.560421
Turanose	547-25-1	C19636	C12H22O11	Fatty Acyls	0.167606	0.209154	1.12857	0.179687
Lactulose	4618-18-2	C07064	C12H22O11	Organooxygen compounds	0.167606	0.209154	1.12857	0.179687
Prephenate	126-49-8	C00254	C10H10O6	Keto acids and derivatives	2.8288e-05	3.71844e-05	1.12934	0.179729
3-Nitro-L-tyrosine	621-44-3		C9H10N2O5	Miscellaneous	5.33528e-05	6.0025e-05	0.459488	0.750657
Myristoleic acid	544-64-9	C08322	C14H26O2	Lipids	0.00011739	0.000103609	0.852486	0.548627
Deoxylapachol	3568-90-9	C10325	C15H14O2	Quinones	7.7466e-05	9.5004e-05	0.953917	0.26539
Glycerophosphocholine	28319-77-9	C00670	C8H20NO6P	Cholines	4.14353e-05	1.82762e-05	1.9165	0.0370911
Acetamide	60-35-5	C06244	C2H5NO	Alkaloids	0.0197473	0.0147059	1.27941	0.110898
Glucose 1-phosphate	59-56-3	C00103	C6H13O9P	Organooxygen compounds	0.00416672	0.00249074	1.78719	0.0593938
Mannose 6-phosphate	3672-15-9	C00275	C6H13O9P	Organooxygen compounds	0.000213447	0.000156128	0.722242	0.402673
vitamin K2	11032-49-8		C41H56O2	Vitamins	0.000596026	0.000342637	2.12075	0.00383422
(S)-(-)-Perillyl alcohol	18457-55-1	C02452	C10H16O	Monoterpenoids	0.00107959	0.00066636	1.33813	0.0955238
p-Cymene	99-87-6	C06575	C10H14	Monoterpenoids	0.000159451	0.00024212	1.18228	0.149591
Mandelic acid	611-71-2	C01983	C8H8O3	Phenols	0.000909462	0.000941872	0.275911	0.923959
Oleamide	301-02-0	C19670	C18H35NO	Fatty Acyls	0.0542197	0.0731435	0.187614	0.715559
N,N'-diacetylchitobiose	35061-50-8	C01674	C16H28N2O11	Organooxygen compounds	9.70346e-05	6.56405e-05	1.22243	0.161197
(+)-Glaucarubinone	1259-86-5	C08763	C25H34O10	Diterpenoids	8.14079e-05	0.000183037	1.64893	0.0475864
Acetyl tryptophan	2280-01-5	C03137	C13H14N2O3	Amino acid and derivatives	5.70335e-05	4.73717e-05	0.893322	0.367183
Chamazulene	529-05-5	C09633	C14H16	lipids	0.000110984	0.000139496	0.248509	0.591222
1-Indanone;Indanone	83-33-0	C01504	C9H8O	Indanes	0.000501963	0.000722736	1.20833	0.15477
(S)-2-Acetolactate		C06010	C5H8O4	Keto acids and derivatives	0.000255518	0.000238097	0.506387	0.665593
Atropaldehyde	4432-63-7	C16592	C9H8O	Benzene and substituted derivatives	0.000331059	0.000252886	1.01867	0.254176
9-Hydroxycalabaxanthone	35349-68-9		C24H24O6	Xanthones	3.475e-05	2.85601e-05	0.860687	0.465394
Bakkenolide D	18456-03-6		C21H28O6S	Miscellaneous	8.52477e-05	6.29568e-05	0.873866	0.409742
dUMP	964-26-1	C00365	C9H13N2O8P	Pyrimidine nucleotides	0.000121902	5.3433e-05	1.2569	0.241331
Diphyllin	22055-22-7	C10559	C21H16O7	Lignans	5.21758e-05	4.11977e-05	0.62329	0.447184
Vitamin A2 aldehyde	472-87-7	C05918	C20H26O	Prenol lipids	0.000261901	8.02903e-05	1.69115	0.0746561
Pseudobaptigenin	90-29-9	C10522	C16H10O5	Isoflavonoids	2.85412e-05	6.66616e-05	1.74611	0.0318281
Artemisinin	63968-64-9	C09538	C15H22O5	Sesquiterpenoids	0.00509667	0.00345744	1.15946	0.189498
Miltirone	27210-57-7	C13715	C19H22O2	Diterpenoids	0.0336057	0.0168663	1.43381	0.025035
Octyl Gallate	1034-01-1		C15H22O5	Phenols	0.000353021	0.000288613	0.258664	0.526277
4-Guanidinobutyric acid	463-00-3	C01035	C5H11N3O2	Organic acids	0.00303142	0.00469886	1.60706	0.0298749
Allysine(6-Oxo DL-Norleucine)	6665-12-9	C04076	C6H11NO3	Amino acid and derivatives	0.000165557	0.000230648	1.03283	0.188265
Alantolactone	546-43-0	C09289	C15H20O2	Sesquiterpenoids	0.000350494	0.000312835	0.558849	0.724635
Isoalantolactone	470-17-7	C09484	C15H20O2	Sesquiterpenoids	0.000270315	0.000296769	0.322312	0.806593
Encecalin	20628-09-5	C09005	C14H16O3	Phenols	0.000580395	0.000514162	1.69192	0.0359617
Aloperine	56293-29-9	C10748	C15H24N2	Alkaloids	0.000196522	0.00025213	1.6456	0.0510443
(2S,3R,4E)-2-Amino-4-heptadecene-1,3-diol	6918-48-5		C17H35NO2	Alkaloids	0.000389987	0.000348833	0.493821	0.649664
Bufalin	465-21-4	C16922	C24H34O4	Steroids and steroid derivatives	4.6633e-05	4.41157e-05	0.273084	0.928887
Solasodine	126-17-0	C10822	C27H43NO2	Alkaloids	0.000280122	0.00027199	0.0220024	0.919053
Calycanthine	595-05-1	C10573	C22H26N4	Alkaloids	3.96726e-05	3.91295e-05	0.453629	0.977349
Allopregnanolone	516-54-1	C13712	C21H34O2	Steroids and steroid derivatives	0.000150732	0.000127948	0.0408595	0.717038
Maltotetraose	34612-38-9	C02052	C24H42O21	Carbohydrates	0.000179477	0.000157756	0.758818	0.616782
Stachyose	10094-58-3; 470-55-3	C01613	C24H42O21	Organooxygen compounds	0.000179477	0.000157756	0.758818	0.616782
(-)-Epiafzelechin	24808-04-6	C12128	C15H14O5	Flavonoids	6.12341e-05	5.5967e-05	0.308308	0.81547
Bellidifolin	2798-25-6	C10053	C14H10O6	Xanthones	0.000112505	6.44773e-05	1.23559	0.155916
1,3,6-Trihydroxy-5-methoxyxanthone	41357-84-0		C14H10O6	Xanthones	0.000128168	6.44773e-05	1.44565	0.06576
N-Acetyl-L-histidine	2497-02-1	C02997	C8H11N3O3	Carboxylic acids and derivatives	8.09934e-05	0.000143292	1.36893	0.0717149
Metanephrine	5001-33-2	C05588	C10H15NO3	Phenols	2.02549e-05	3.72467e-05	1.58346	0.08548
Betulin	473-98-3	C08618	C30H50O2	Triterpenoids	0.000125652	0.000132381	0.0932808	0.862431
Sulforaphane	4478-93-7		C6H11NOS2	Miscellaneous	6.43163e-05	5.20503e-05	0.991918	0.226256
p-Cresol	106-44-5	C01468	C7H8O	Phenols	0.000190657	0.000128261	1.80423	0.0267396
(-)-Salsoline	89-31-6	C09640	C11H15NO2	Tetrahydroisoquinolines	4.62529e-05	3.33974e-05	1.1342	0.196945
Gentioflavin	18058-50-9	C09962	C10H11NO3	Alkaloids	7.22243e-05	6.66791e-05	0.304573	0.882709
DG(16:0/16:0/0:0)	30334-71-5	C00165	C35H68O5	Glycerolipids	0.00569676	0.00441531	0.693797	0.630727
Streptozotocin	18883-66-4	C07313	C8H15N3O7	Organooxygen compounds	4.37084e-05	4.85249e-05	0.159533	0.840725
(-)-Anonaine	1862-41-5	C09339	C17H15NO2	Alkaloids	1.54847e-05	2.86026e-05	0.986156	0.187282
D-Pinitol	10284-63-6	C03844	C7H14O6	Miscellaneous	6.64563e-05	8.83268e-05	1.054	0.241031
3-Hydroxy-4-methoxycinnamic acid; Isoferulic acid	537-73-5	C10470	C10H10O4	Phenylpropanoids	0.000155275	0.000157759	0.0351223	0.967307
Methyl caffeate acid	3843-74-1	C10477	C10H10O4	Phenylpropanoids	0.000202667	0.000146432	0.699961	0.27012
Kakuol	18607-90-4	C16982	C10H10O4	Phenols	6.27287e-05	5.4732e-05	0.200625	0.601661
Neocnidilide	4567-33-3	C17002	C12H18O2	Lactones	7.94146e-05	6.03239e-05	0.772718	0.327146
Zingerone	122-48-5	C17497	C11H14O3	Phenols	3.34762e-05	2.24525e-05	0.271011	0.329334
Butyl 4-Hydroxybenzoate	94-26-8		C11H14O3	Lignans	5.52562e-05	5.4732e-05	0.108959	0.965899
Pipermethystine	71627-22-0		C16H17NO4	Alkaloids	0.000143134	0.000124762	0.617162	0.40366
Mangiferin	4773-96-0	C10077	C19H18O11	Xanthones	0.000148078	0.000101734	0.749149	0.295979
Kazinol A	99624-28-9	C09760	C25H30O4	Flavonoids	0.000148211	0.000112582	0.76944	0.256795
Deguelin	522-17-8	C10417	C23H22O6	Flavonoids	3.23135e-05	2.46111e-05	0.0513737	0.605797
Theobromine	83-67-0	C07480	C7H8N4O2	Alkaloids	6.4164e-05	6.66154e-05	0.149004	0.821237
Coniferyl alcohol	458-35-5; 32811-40-8	C00590	C10H12O3	Phenylpropanoids	8.56378e-05	0.000115035	1.22341	0.139152
Trans-caffeic acid	501-16-6	C01197	C9H8O4	Phenylpropanoids	6.90694e-05	5.60377e-05	0.793523	0.3557
4-Hydroxy-3-methoxymandelate; Vanillylmandelic acid	55-10-7	C05584	C9H10O5	Phenols	5.22959e-05	5.52998e-05	0.409054	0.856354
Neosperidin dihydrochalcone	20702-77-6		C28H36O15	Chalcones	0.00102498	0.000319926	0.920285	0.223371
Glutathione oxidized	27025-41-8	C00127	C20H32N6O12S2	Amino acid and derivatives	8.18289e-05	5.26466e-05	0.000905386	0.642658
Hydroxysafflor yellow A	78281-02-4		C27H32O16	Chalcones	0.00921337	0.00527139	0.487555	0.248161
Quercitrin	522-12-3	C01750	C21H20O11	Flavonoids	7.06814e-05	4.91534e-05	1.25464	0.126216
Luteolin-7-O-glucoside;2-(3,4-dihydroxyphenyl)-5-hydroxy-7-[(2S,3R,4S,5S,6R)-3,4,5-trihydroxy-6-(hydroxymethyl)oxan-2-yl]oxychromen-4-one	5373-11-5	C03951	C21H20O11	Flavonoids	3.57214e-05	5.34998e-05	0.816177	0.270105
Dictamnine	484-29-7	C10660	C12H9NO2	Alkaloids	8.20519e-05	9.88519e-05	1.19471	0.169343
Tussilagine	80151-77-5	C10411	C10H17NO3	Alkaloids	2.71293e-05	1.71775e-05	0.876504	0.197326
Cevadine	62-59-9		C32H49NO9	Alkaloids	0.000165277	0.000151772	0.176079	0.824235
Withanolide A	32911-62-9		C28H38O6	Steroids and steroid derivatives	0.000124655	0.000127611	0.153631	0.957256
11-Keto-beta-boswellic acid	17019-92-0		C30H46O4	Triterpenoids	3.83979e-05	2.67356e-05	0.940582	0.2843
Ganoderic acid F	98665-15-7		C32H42O9	Triterpenoids	4.88584e-05	3.9788e-05	0.27439	0.59898
Esculin	531-75-9	C09264	C15H16O9	Coumarins	2.23497e-05	1.96903e-05	0.502824	0.668618
Broussonin C	76045-49-3	C09524	C20H24O3	Phenols	9.01918e-05	4.92666e-05	1.37978	0.119492
2-Hydroxy-6-oxo-6-(2-carboxyphenyl)-hexa-2,4-dienoate		C16264	C13H10O6	Carboxylic acids and derivatives	0.000100093	7.56362e-05	1.02791	0.184362
D-Aspartic acid	1783-96-6	C00402	C4H7NO4	Alkaloids	0.00965396	0.00780566	1.73986	0.0212928
indolin-2-one	59-48-3	C12312	C8H7NO	Alkaloids	6.14932e-05	8.85434e-05	1.00165	0.147041
Protoveratrine A	143-57-7	C10815	C41H63NO14	Alkaloids	8.81828e-05	0.000104107	0.129234	0.730194
Chelidonine	476-32-4	C12242	C20H19NO5	Alkaloids	0.000116355	8.63511e-05	1.18452	0.209971
Agrocybenine	178764-92-6		C12H18N2O	Alkaloids	4.71632e-05	9.90926e-05	1.6604	0.0226446
Scoparone	120-08-1	C09311	C11H10O4	Coumarins	0.00168065	0.00139562	1.07185	0.182186
alpha-Irone	79-69-6; 35124-13-1	C09690	C14H22O	Prenol lipids	0.00344029	0.00242046	1.65831	0.0269621
2-Hydroxy-3-methylbenzalpyruvate		C14086	C11H10O4	Cinnamic acid and its derivatives	0.000777524	0.00089024	0.948134	0.305898
3-Methoxy-4,5-methylenedioxycinnamaldehyde	74683-19-5		C11H10O4	Phenylpropanoids	0.000195107	0.000169706	0.807237	0.424648
Securinine	5610-40-2	C10614	C13H15NO2	Alkaloids	0.000109264	0.000100426	0.343626	0.744585
Narciclasine	29477-83-6	C08533	C14H13NO7	Alkaloids	0.000118934	8.7332e-05	0.99906	0.320305
Alisol A	19885-10-0	C17459	C30H50O5	Triterpenoids	3.24312e-05	4.02127e-05	0.675342	0.447455
N1-Methyl-4-pyridone-3-carboxamide	769-49-3	C05843	C7H8N2O2	Pyridines and derivatives	0.000177629	0.000147811	0.489741	0.752265
3,4-Dihydroxyphenylglycol	28822-73-3; 3343-19-9	C05576	C8H10O4	Phenols	0.000433693	0.000477311	0.486794	0.647716
(+)-Camphor	464-49-3	C00808	C10H16O	Monoterpenoids	0.000407466	0.000332467	0.729614	0.318241
Vanillin	121-33-5	C00755	C8H8O3	Phenols	0.0018866	0.00159038	0.764125	0.348136
Methyl salicylate;Methyl 2-hydroxybenzoate	119-36-8	C12305	C8H8O3	Phenols	0.000110484	0.000148587	0.930363	0.224062
3-(4-Hydroxyphenyl)-1-propanol	10210-17-0		C9H12O2	Phenylpropanoids	9.83342e-05	0.000126954	1.49437	0.0619823
3,4-Dihydroxyphenylacetaldehyde	5707-55-1	C04043	C8H8O3	Benzene and substituted derivatives	8.2363e-05	7.58532e-05	0.254735	0.70456
Cleomiscosin A	76948-72-6	C09922	C20H18O8	Coumarins	0.000101369	8.60913e-05	0.0445476	0.705487
Pinoresinol dimethyl ether	29106-36-3	C10561	C22H26O6	Lignans	8.99139e-05	0.000118958	0.662917	0.401767
Porson	56222-03-8		C22H26O6	Phenols	2.17915e-05	2.52346e-05	0.451915	0.472643
Morusin	62596-29-6	C10106	C25H24O6	Flavonoids	0.000819561	0.00074522	0.787863	0.396263
7-Hydroxyflavone	6665-86-7	C11264	C15H10O3	Flavonoids	3.03755e-05	4.06645e-05	0.181507	0.542617
Bisabolol oxide A	22567-36-8	C16773	C15H26O2	Sesquiterpenoids	0.000432483	0.000493231	0.67326	0.466776
Cheilanthifoline	483-44-3	C05174	C19H19NO4	Miscellaneous	2.7991e-06	3.64518e-06	0.732063	0.47667
Cassythicine	5890-28-8	C09389	C19H19NO4	Alkaloids	3.07876e-05	6.70157e-05	2.42162	8.37698e-05
L-Pipecolic acid	535-75-1; 3105-95-1	C00408	C6H11NO2	Amino acid and derivatives	0.0213229	0.0323425	1.60658	0.0415296
Pyrrolidonecarboxylic acid	4042-36-8	C02237	C5H7NO3	Carboxylic acids and derivatives	0.0213229	0.0323425	1.60658	0.0415296
Lancerin	81991-99-3	C10075	C19H18O10	Xanthones	9.96154e-05	8.8077e-05	0.469665	0.686747
Safflor Yellow A	85532-77-0		C27H30O15	Chalcones	0.000146267	0.000285796	0.870265	0.261175
Lonicerin	25694-72-8	C12630	C27H30O15	Flavonoids	2.7234e-05	3.31888e-05	0.679702	0.427363
Poncirin	14941-08-3	C09830	C28H34O14	Flavonoids	3.04302e-05	2.54103e-05	0.347559	0.556001
Pelargonidin-3,5-O-diglucoside chloride	17334-58-6	C08725	C27H30O15	Flavonoids	0.00450178	0.00323174	0.0859431	0.499062
Ganoderic acid H	98665-19-1		C32H44O9	Triterpenoids	0.000153103	8.95555e-05	1.32266	0.167541
Bruceine D	21499-66-1	C08752	C20H26O9	Diterpenoids	8.45273e-05	8.4425e-05	0.0253423	0.995662
Daidzein-4',7-diglucoside	53681-67-7		C27H30O14	Flavonoids	5.07279e-05	5.84678e-05	0.539798	0.766847
Tangeretin	481-53-8	C10190	C20H20O7	Flavonoids	0.000335773	0.000529697	1.36859	0.195174
Tetrahydrocurcumin	36062-04-1		C21H24O6	Phenols	1.73049e-05	5.39633e-05	1.03847	0.199727
Veraguensin	19950-55-1	C10892	C22H28O5	Lignans	0.000135456	6.73983e-05	1.16674	0.173083
Loganin	18524-94-2	C01433	C17H26O10	Terpene	0.000202452	0.000106127	1.87506	0.0162898
Kadsurin A	99340-07-5	C10640	C21H24O6	Lignans	3.18234e-05	5.15346e-05	1.19013	0.152598
Curcumin	458-37-7	C10443	C21H20O6	Phenols	0.000923989	0.00167364	1.66616	0.078532
Mitraphylline	509-80-8	C09227	C21H24N2O4	Alkaloids	3.18764e-05	3.29461e-05	0.448168	0.914338
5-Carboxyvanillic acid	2134-91-0	C18338	C9H8O6		2.71135e-05	3.6139e-05	0.883379	0.353865
C-Veratroylglycol	168293-10-5		C10H12O5	Phenylpropanoids	5.63501e-05	9.26203e-05	1.98758	0.014956
Geniposidic acid; Geniposidic acid	27741-01-1	C11673	C16H22O10	Iridoids; Terpene	1.14731e-05	1.26712e-05	0.4429	0.789528
Isodiospyrin	20175-84-2	C10358	C22H14O6	Quinones	8.91817e-05	0.000124664	1.13007	0.213284
Schaftoside	51938-32-0	C10181	C26H28O14	Flavonoids	0.000857297	0.000904093	0.449656	0.688359
Glucofrangulin B	14062-59-0	C16803	C26H28O14	Anthraquinones	0.00612918	0.00548224	1.52066	0.0532292
Isovitexin 2''-O-arabinoside	53382-71-1		C26H28O14	Flavonoids	0.0113081	0.00987812	1.16988	0.151975
Cholesterol	57-88-5	C00187	C27H46O	Steroids and steroid derivatives	0.000383988	0.00055828	0.873631	0.299442
Lathosterol	80-99-9	C01189	C27H46O	Steroids and steroid derivatives	0.000229281	0.00018936	0.837124	0.32919
Dihydrozeatin	23599-75-9	C02029	C10H15N5O	Imidazopyrimidines	0.000133017	9.43587e-05	1.03345	0.200029
Lubiprostone	136790-76-6; 333963-40-9	C13707	C20H32F2O5	Fatty Acyls	0.0416426	0.0327829	0.389092	0.446867
Styrene Oxide	96-09-3	C02083	C8H8O	Benzene and substituted derivatives	0.000367033	0.000317531	0.289374	0.536712
Isoxanthopterin	529-69-1	C03975	C6H5N5O2	Pteridines and derivatives	5.55186e-05	4.65873e-05	1.02058	0.517602
Glucosamine	3416-24-8	C00329	C6H13NO5	Carbohydrates	2.52619e-05	4.72013e-05	1.30074	0.19126
beta-Ionone	79-77-6	C12287	C13H20O	Prenol lipids	0.000139609	0.000170276	0.140282	0.674363
Carvacryl acetate	6380-28-5		C12H16O2	Monoterpenoids	0.00016771	0.000191669	0.340614	0.54229
Methyl hexadecanoic acid	112-39-0	C16995	C17H34O2	Fatty Acyls	0.000174122	0.000183954	0.449773	0.846071
Fingolimod hydrochloride	162359-56-0		C19H33NO2	Miscellaneous	0.000110329	9.40738e-05	0.650369	0.608095
Isovitexin	38953-85-4	C01714	C21H20O10	Flavonoids	0.00499159	0.00432841	0.417272	0.748875
Afzelin;Kaempferol 3-O-rhamnoside (Kaempferin)	482-39-3	C16911	C21H20O10	Flavonoids	3.90326e-05	2.98048e-05	0.724684	0.546499
Campesterol	474-62-4	C01789	C28H48O	Steroids and steroid derivatives	0.00303934	0.00326853	0.152764	0.776241
Glyceric acid	473-81-4	C00258	C3H6O4	Organooxygen compounds	0.00427572	0.00453008	0.295294	0.789673
L-Hypoglycin A	156-56-9	C08287	C7H11NO2	Carboxylic acids and derivatives	0.000100999	9.57587e-05	0.0144592	0.801993
Hinokiflavone	19202-36-9	C10057	C30H18O10	Flavonoids	0.000122454	9.17389e-05	0.224316	0.46042
3,8'-Biapigenin	101140-06-1		C30H18O10	Flavonoids	0.000122454	9.17389e-05	0.224316	0.46042
Swertiajaponin	6980-25-2	C10187	C22H22O11	Flavonoids	2.56666e-05	1.37336e-05	1.62688	0.0382565
Peonidin-3-glucoside	68795-37-9	C12141	C22H22O11	Flavonoids	0.0438809	0.0278101	1.93623	0.0108073
Quercetin-7-O-beta-D-glucopyranoside	491-50-9	C12639	C21H20O12	Flavonoids	5.7717e-05	5.29254e-05	0.0790134	0.770941
Myricitrin;Myricetin 3-O-rhamnoside (Myricitrin)	17912-87-7	C10108	C21H20O12	Flavonoids	5.43569e-05	8.32365e-05	0.787133	0.254243
Hesperetin 7-O-glucoside	31712-49-9	C16422	C22H24O11	Flavonoids	5.33189e-05	5.29254e-05	0.213437	0.978476
Quercetagetin	90-18-6	C10122	C15H10O8	Flavonoids	0.00261899	0.00199202	1.49119	0.0983398
Ethyl 3,4,5-trimethoxybenzoate	6178-44-5		C12H16O5	Phenols	2.86849e-05	3.50108e-05	0.610102	0.423304
Neoeriocitrin	13241-32-2	C09805	C27H32O15	Flavonoids	0.000193154	9.90849e-05	1.59148	0.112937
Eriocitrin	13463-28-0	C09732	C27H32O15	Flavonoids	0.000193154	0.00013601	1.08809	0.281712
Salannin	992-20-1	C08780	C34H44O9	Triterpenoids	7.72312e-05	6.30661e-05	0.606328	0.333235
Isorhamnetin-3-O-neohespeidoside	55033-90-4		C28H32O16	Flavonoids	0.000382177	0.000192928	2.09398	0.00391568
Verbascoside	61276-17-3	C10501	C29H36O15	Phenylpropanoids	0.000104579	9.47136e-05	0.181307	0.747056
Isoacteoside	61303-13-7		C29H36O15	Phenylpropanoids	2.92373e-05	7.0953e-05	1.34898	0.0729972
Stigmasterol	83-48-7	C05442	C29H48O	Steroids and steroid derivatives	0.000131654	0.000410191	1.91299	0.00849637
alpha-Spinasterol	481-18-5	C08840	C29H48O	Steroids and steroid derivatives	0.000380621	0.000304597	0.842418	0.389056
Benzoylagmatine		C02253	C12H18N4O		0.00034151	0.000441138	1.19969	0.13863
Bakkenolide A	19906-72-0	C09350	C15H22O2	Miscellaneous	0.000328085	0.000295807	0.701268	0.665671
1'-Acetoxychavicol acetate	52946-22-2	C10426	C13H14O4	Phenols	0.000217674	0.000182916	0.625057	0.351969
N-p-Coumaroyl putrescine	34136-53-3	C18326	C13H18N2O2	Phenolamides	0.000704178	0.000706926	0.03382	0.982591
beta-Costic acid	3650-43-9		C15H22O2	Sesquiterpenoids	5.3612e-05	5.64671e-05	0.0702968	0.885319
Sclareol	515-03-7	C09183	C20H36O2	Diterpenoids	6.95362e-05	9.69132e-05	0.482376	0.411532
Dexamethasone	50-02-2	C06945; C15643	C22H29FO5	Steroids and steroid derivatives	0.000129478	9.02731e-05	1.18513	0.124354
Dipterocarpol	471-69-2	C08622	C30H50O2	Triterpenoids	0.000127023	0.000151905	0.539229	0.567791
Vanillic acid	121-34-6	C06672	C8H8O4	Phenols	0.0012542	0.00138521	0.744285	0.388643
p-Hydroxymandelic acid	1198-84-1	C11527	C8H8O4	Phenols	4.88355e-05	8.02632e-05	1.75389	0.0537161
Beta-Sitosterol; beta-Sitosterol	83-46-5	C01753	C29H50O	Steroids and steroid derivatives	9.07318e-05	7.43278e-05	0.298083	0.66488
cis-2-Methylaconitate	6061-93-4	C04225	C7H8O6	Carboxylic acids and derivatives	5.55216e-05	3.79228e-05	1.31779	0.144683
N6-Acetyl-L-lysine	692-04-6	C02727	C8H16N2O3	Amino acid and derivatives	0.00239701	0.00341901	0.87843	0.197721
Vasicine	6159-55-3	C10733	C11H12N2O	Alkaloids	3.60272e-05	3.70204e-05	0.41779	0.902055
3-Butylidenephthalide	551-08-6	C16924	C12H12O2	Miscellaneous	6.37822e-05	3.4407e-05	1.78348	0.0283579
2,6-Dimethyl-7-octene-2,3,6-triol	73815-21-1		C10H20O3	Monoterpenoids	1.95565e-05	1.96466e-05	0.155262	0.988196
Pseudouridine 5'-phosphate	1157-60-4	C01168	C9H13N2O9P	Organooxygen compounds	0.000432879	0.000308208	0.746746	0.313845
Leucodopachrome	18766-67-1	C05604	C9H9NO4	Indoles and derivatives	0.000177956	0.000170445	0.0828444	0.895146
Guaiacol	90-05-1	C15572; C01502	C7H8O2	Phenols	9.84145e-05	0.000110719	0.431558	0.686776
2'-O-Methyladenosine	2140-79-6	C04779	C11H15N5O4	Purine nucleosides	9.46009e-05	6.69641e-05	0.582536	0.400313
4-Hydroxyphenylacetylglutamic acid		C05595	C13H15NO6		0.08039	0.0543989	1.47808	0.0697394
Xanthurenic acid	59-00-7	C02470	C10H7NO4	Quinolines and derivatives	0.000115209	0.000129231	0.636126	0.46883
Methoxyindoleacetic acid	3471-31-6	C05660	C11H11NO3	Indoles and derivatives	0.000586153	0.000662168	0.898944	0.362402
Beta-D-Fructose 2-phosphate	19046-69-6	C03267	C6H13O9P	Organooxygen compounds	0.0160512	0.0122952	1.95805	0.00891595
N-D-Glucosylarylamine		C03142	C12H17NO5		5.1146e-05	4.96691e-05	0.149538	0.888609
8-Azabicyclo-3.2.1-octan-3-ol	501-33-7		C7H13NO	Alkaloids	1.5077e-05	1.54445e-05	0.630596	0.957609
Dulcoside A	64432-06-0		C38H60O17	Diterpenoids	3.11371e-05	2.6604e-05	0.715366	0.639189
gamma-Hydroxy-3-pyridinebutanoate	15569-97-8	C19579	C9H11NO3	Pyridines and derivatives	3.72528e-05	2.96649e-05	0.657767	0.784811
Beta-Tyrosine	6049-54-3	C04368	C9H11NO3	Carboxylic acids and derivatives	0.00363293	0.00360211	0.160194	0.975399
Palmitic acid	57-10-3	C00249	C16H32O2	Lipids	0.00509674	0.004262	0.23258	0.553255
Liquiritigenin	578-86-9	C09762	C15H12O4	Flavonoids	0.000155945	0.000119211	1.31483	0.121043
1-(beta-D-Ribofuranosyl)-1,4-dihydronicotinamide	19132-12-8	C15497	C11H16N2O5	Organooxygen compounds	0.000559914	0.000390911	1.10469	0.140672
3,9-Dihydroxypterocarpan	61135-91-9	C04271	C15H12O4	Flavonoids	0.000534752	0.00042161	1.73346	0.0293354
Huperzine B	103548-82-9	C09866	C16H20N2O	Alkaloids	1.49598e-05	1.82473e-05	0.195471	0.625738
Hydrangenol	480-47-7	C10262	C15H12O4	Flavonoids	0.000292068	0.00028045	0.441001	0.908829
1-(alpha-Methyl-4-(2-methylpropyl)benzeneacetate)-beta-D-Glucopyranuronic acid	115075-59-7	C03033	C19H26O8	Organooxygen compounds	0.000116873	0.000147514	0.752651	0.427682
Physalin D	54980-22-2		C28H32O11	Steroids and steroid derivatives	0.000182379	0.000135214	0.773438	0.370346
Ethyl caproate	123-66-0		C8H16O2	Miscellaneous	0.00130217	0.00140808	0.587542	0.745734
2,6-Dimethylaniline	87-62-7	C11004	C8H11N	Benzene and substituted derivatives	0.000112439	0.000180525	1.72546	0.0376872
12(13)-EpOME	948310-68-7	C14826	C18H32O3	Fatty Acyls	0.0001715	0.000117136	1.16658	0.17866
Antirhine	16049-28-8	C09033	C19H24N2O	Alkaloids	0.000126986	8.60838e-05	1.02767	0.245151
2-(2-Hydroxy-2-propyl)-5-methyl-5-vinyltetrahydrofuran	60047-17-8		C10H18O2	Monoterpenoids	0.000161171	0.000129354	0.759724	0.330482
Phosphonoacetate	4408-78-0	C05682	C2H5O5P	Organic acids	0.000354289	0.00044834	1.31167	0.125408
Furfuryl acetate	623-17-6		C7H8O3	Miscellaneous	0.000128897	9.51694e-05	0.820766	0.26162
Dhurrin	499-20-7	C05143	C14H17NO7	Alkaloids	0.000237431	0.000227502	0.37693	0.889234
Stearic Acid	57-11-4	C01530	C18H36O2	Fatty Acyls	0.000338545	0.000252368	0.989166	0.208328
Neolitsine	2466-42-4		C19H17NO4	Alkaloids	3.21207e-05	4.35627e-05	0.524208	0.382645
(S)-N-Methylcoclaurine	3423-07-2	C05176	C18H21NO3	Isoquinolines and derivatives	1.21875e-05	1.36312e-05	0.225806	0.775438
(S)-Actinidine	524-03-8	C09910	C10H13N	Pyridines and derivatives	6.11392e-05	5.4237e-05	0.447735	0.731629
1H-Indole-2,3-dione	91-56-5	C11129	C8H5NO2	Indoles and derivatives	0.000123878	9.7564e-05	0.813387	0.279524
Pregabalin	148553-50-8		C8H17NO2	Miscellaneous	0.000742085	0.000471865	1.22093	0.166555
Piperidine	110-89-4	C01746	C5H11N	Alkaloids	3.73315e-05	4.62238e-05	0.903555	0.406624
2-Hydroxypyridine	142-08-5	C02502	C5H5NO	Alkaloids	2.19391e-05	2.79118e-05	0.393077	0.486018
Biliverdin	114-25-0	C00500	C33H34N4O6	Tetrapyrroles and derivatives	0.000150845	0.000109496	0.994366	0.192669
(+)-Lyoniresinol 9'-O-glucoside	87585-32-8		C28H38O13	Lignans	0.000131917	9.03119e-05	1.01554	0.241342
7-(4-Hydroxyphenyl)-1-phenyl-4-hepten-3-one	100667-52-5		C19H20O2	Phenols	0.00125018	0.00122523	0.186583	0.917555
Denudatine	26166-37-0	C08680	C22H33NO2	Alkaloids	8.20814e-05	8.59277e-05	0.166583	0.880114
Malvidin-3-O-galactoside	30113-37-2		C23H25O12	Flavonoids	0.000546168	0.000538446	0.135144	0.965948
Talatisamine	20501-56-8	C08713	C24H39NO5	Alkaloids	0.000148288	0.000133184	0.380687	0.829171
Paeoniflorin	23180-57-6	C09959	C23H28O11	Monoterpenoids	4.5252e-05	9.13622e-05	1.64775	0.0245988
2,3-Dehydrosilybin A	25166-14-7		C25H20O10	Flavonoids	9.25395e-05	6.48289e-05	1.19258	0.157755
5-Tricosyl-1,3-benzenediol	70110-60-0		C29H52O2	Phenols	6.34231e-05	7.28309e-05	0.405508	0.737208
N2-gamma-Glutamylglutamine	1466-50-8	C05283	C10H17N3O6	Carboxylic acids and derivatives	2.55337e-05	4.23152e-05	1.38646	0.129431
Ginsenoside Re	52286-59-6	C08944	C48H82O18	Triterpenoids	2.19266e-05	3.6612e-05	0.460268	0.522278
Pilocarpine	92-13-7	C07474	C11H16N2O2	Alkaloids	4.77155e-05	4.17639e-05	0.110588	0.787532
Anthraquinone	84-65-1	C16207	C14H8O2	Anthraquinones	0.000131092	0.000112046	0.709802	0.490772
trans-3,5-Dimethoxy-4-hydroxy cinnamaldehydee	4206-58-0	C05610	C11H12O4	Phenylpropanoids	0.00186533	0.00138255	1.23575	0.174572
6-Methoxymellein	13410-15-6	C02381	C11H12O4	Benzopyrans	4.05645e-05	5.69434e-05	1.18465	0.107001
Primin	15121-94-5	C10390	C12H16O3	Quinones	0.00114242	0.000851496	1.3033	0.102779
Cimifugin	37921-38-3	C09000	C16H18O6	Flavonoids	2.20574e-05	1.68035e-05	0.442132	0.434213
Tenulin	19202-92-7	C09557	C17H22O5	Sesquiterpenoids	2.32345e-05	1.73344e-05	0.456087	0.36949
Lipiferolide	41059-80-7	C09497	C17H22O5	Sesquiterpenoids	6.27373e-05	7.84037e-05	0.325191	0.613529
22-Dehydroclerosterol	26315-07-1		C29H46O	Steroids	0.00374618	0.00319855	0.0481538	0.647894
Luvangetin	483-92-1	C09273	C15H14O4	Coumarins	0.000173275	0.000103604	1.10619	0.240614
Yangonin	500-62-9	C09980	C15H14O4	Phenols	0.000151396	0.000163372	0.277869	0.787726
(R)-Acetoin	513-86-0; 53584-56-8	C00810; C00466	C4H8O2	Miscellaneous	0.000383537	0.000547052	0.944929	0.229378
Ipecoside	15401-60-2	C09464	C27H35NO12	Iridoids	6.76613e-05	5.57189e-05	0.629561	0.499046
Cardanol (C15:1)	501-26-8	C10785	C21H34O	Phenols	8.58392e-05	6.55165e-05	0.442603	0.371129
Piperlonguminine	5950-12-9		C16H19NO3	Alkaloids	0.00249137	0.00253885	0.35702	0.974321
Cochlearine	52418-07-2	C10853	C15H19NO3	Alkaloids	3.37784e-05	2.78847e-05	0.747579	0.430678
Podophyllotoxinone	477-49-6	C10875	C22H20O8	Lignans	0.000310697	9.3391e-05	2.30732	0.0237833
5-Methyl-2-furaldehyde	620-02-0	C11115	C6H6O2	Aldehyde	0.00181786	0.00138249	1.5765	0.0640205
Podophyllotoxin	518-28-5	C10874	C22H22O8	Lignans	2.95309e-05	3.35819e-05	0.362194	0.670704
NG,NG-Dimethylarginine dihydrochloride	220805-22-1; 30315-93-6	C03626	C8H18N4O2	Carboxylic acids and derivatives	0.000936633	0.00137465	1.63376	0.051713
Homodihydrocapsaicin I	20279-06-5		C19H31NO3	Miscellaneous	2.13087e-05	1.97349e-05	0.143323	0.826518
4'-Demethylpodophyllotoxin	40505-27-9	C10553	C21H20O8	Lignans	3.65375e-05	6.1567e-05	1.40059	0.0918082
Epifriedelanol	16844-71-6	C17123	C30H52O	Triterpenoids	0.000144888	0.00013043	0.707888	0.840849
Ergosterol peroxide	2061-64-5		C28H44O3	Steroids and steroid derivatives	6.04994e-05	4.86818e-05	0.837586	0.590141
4-Nitrocatechol	3316-09-4	C02235	C6H5NO4	Phenols	0.000103361	0.000115714	0.804624	0.782717
Methylisopelletierine	18747-42-7	C06184	C9H17NO	Alkaloids	1.69322e-05	2.09432e-05	0.796709	0.457015
Garcinone D	107390-08-9		C24H28O7	Xanthones	9.1672e-05	5.76592e-05	0.301636	0.348658
Hypotaurine	300-84-5	C00519	C2H7NO2S	Alkaloids	0.000112721	0.000155751	1.09583	0.173063
Formononetin	485-72-3	C00858	C16H12O4	Flavonoids	3.61909e-05	1.19213e-05	1.22572	0.261731
Tectochrysin	520-28-5	C11621	C16H12O4	Flavonoids	2.23696e-05	2.58465e-05	0.256357	0.693081
Inosine	58-63-9	C00294	C10H12N4O5	Nucleotide and its derivates	0.0138739	0.0120642	0.756962	0.60157
N-(p-Hydroxyphenethyl)actinidine	15794-92-0	C09984	C18H22NO	Phenols	4.8252e-05	5.81613e-05	0.216507	0.549706
Methyl linoleate	112-63-0		C19H34O2	Miscellaneous	0.00020964	0.000266035	0.720408	0.369572
Ganoderol A	104700-97-2		C30H46O2	Triterpenoids	4.66552e-05	6.29229e-05	0.129758	0.53623
8-Hydroxybergapten	1603-47-0		C12H8O5	Coumarins	0.000124437	0.000156009	0.804151	0.387987
Mulberrofuran Q	101383-35-1		C34H24O10	Phenols	5.80833e-05	5.78069e-05	0.0331697	0.992526
Pyridoxine	65-23-6	C00314	C8H11NO3	Vitamins	0.000108379	0.000199805	1.67854	0.0476653
Norepinephrine	51-41-2	C00547	C8H11NO3	Alkaloids	0.000255243	0.000215898	0.402141	0.563247
Jangomolide	93767-25-0		C26H28O8	Triterpenoids	2.52449e-05	2.06165e-05	0.873495	0.420269
L-Acetylcarnitine	5080-50-2	C02571	C9H17NO4	Fatty Acyls	0.000108254	0.000167043	0.462681	0.274011
Kojibiose	2140-29-6	C19632	C12H22O11	Fatty Acyls	0.0221636	0.0268287	0.863172	0.275749
Syringic acid	530-57-4	C10833	C9H10O5	Phenols	2.54764e-05	5.0646e-05	0.97073	0.311266
Ethyl gallate	831-61-8		C9H10O5	Phenols	5.62852e-05	5.45075e-05	0.122724	0.919833
Homopterocarpin	606-91-7		C17H16O4	Flavonoids	4.14399e-05	2.49722e-05	0.193519	0.435376
Calycosin	20575-57-9	C01562	C16H12O5	Flavonoids	5.63264e-05	4.10388e-05	0.749811	0.382412
(-)-Maackiain	2035-15-6	C10502	C16H12O5	Flavonoids	2.60199e-05	2.9704e-05	0.787886	0.633436
Retinoic acid	302-79-4	C00777	C20H28O2	Diterpenoids	8.55826e-05	6.16219e-05	0.0255642	0.406839
Adrenosterone	382-45-6	C05285	C19H24O3	Steroids and steroid derivatives	3.11574e-05	4.23108e-05	1.67924	0.0456385
Farrerol	24211-30-1	C09734	C17H16O5	Flavonoids	0.000117619	0.000225969	1.82634	0.0456683
Vitamin K1	84-80-0	C02059	C31H46O2	Quinones	7.22554e-05	3.49826e-05	0.173697	0.524968
N-Feruloyl putrescine	501-13-3	C10497	C14H20N2O3	Phenolamides	0.000132983	0.00035606	0.670258	0.113887
3-Methylindole	83-34-1	C08313	C9H9N	Alkaloids	2.77477e-05	9.05706e-05	1.29035	0.29417
Beta-Tocopherol	148-03-8	C14152	C28H48O2	Phenols	0.000104986	0.000111733	0.522978	0.64931
Octadecyl p-coumarate	72943-88-5		C27H44O3	Phenylpropanoids	0.000116904	0.000189699	1.08359	0.123609
Tripdiolide	38647-10-8	C09202	C20H24O7	Diterpenoids	4.57827e-05	6.47542e-05	0.448964	0.531649
Picrasin B	26121-56-2	C17050	C21H28O6	Diterpenoids	1.56737e-05	1.91101e-05	0.458936	0.681239
Pyridoxal 5'-phosphate	54-47-7	C00018	C8H10NO6P	Pyridines and derivatives	0.000327093	0.000285099	0.995986	0.77977
5,7-Dihydroxyisoflavone	61-68-7	C02168	C15H15NO2	Flavonoids	1.62263e-05	1.28802e-05	0.799503	0.377741
Pyridoxamine 5'-phosphate	529-96-4	C00647	C8H13N2O5P	Pyridines and derivatives	1.5814e-05	3.67035e-05	1.99249	0.00699122
Pterosin D	34169-70-5		C15H20O3	Sesquiterpenoids	3.61242e-05	3.09459e-05	0.352843	0.687381
Matrine	519-02-8	C10774	C15H24N2O	Alkaloids	1.94595e-05	1.77045e-05	0.616018	0.724795
Nicotinic acid	59-67-6	C00253	C6H5NO2	Nicotinic acid derivatives	0.00263757	0.00303488	0.346931	0.529667
2-Picolinic acid	14639-25-9; 98-98-6	C10164	C6H5NO2	Organic acids	0.000893445	0.00112585	0.607776	0.535263
Eriodictyol	552-58-9	C05631	C15H12O6	Flavonoids	2.96358e-05	3.16785e-05	0.316042	0.810829
Shikonin	517-88-4	C10292	C16H16O5	Quinones	5.6254e-05	9.20806e-05	1.07425	0.0975552
Bovinic acid	2540-56-9	C04056	C18H32O2	Fatty Acyls	2.62187e-05	3.07136e-05	0.839661	0.494811
11b-Hydroxyandrost-4-ene-3,17-dione	382-44-5	C05284	C19H26O3	Steroids and steroid derivatives	4.6192e-05	2.214e-05	0.890205	0.298845
Hesperetin	520-33-2	C01709	C16H14O6	Flavonoids	2.24501e-05	3.06127e-05	0.871556	0.278731
Homoeriodictyol	446-71-9	C09756	C16H14O6	Flavonoids	4.58116e-05	2.61194e-05	1.60059	0.0692939
Nordihydroguaiaretic acid	500-38-9	C10719	C18H22O4	Lignans	1.69685e-05	3.20899e-05	0.866009	0.257366
Kaurenoic acid	6730-83-2	C11874	C20H30O2	Diterpenoids	7.48914e-05	9.10796e-05	0.476613	0.541613
Eicosapentaenoic acid	10417-94-4	C06428	C20H30O2	Fatty Acyls	2.05138e-05	1.12602e-05	0.88022	0.180054
Pedalitin	22384-63-0	C10119	C16H12O7	Flavonoids	0.000147024	0.000124793	0.326196	0.5445
O-Succinyl-L-homoserine	1492-23-5	C01118	C8H13NO6		5.47666e-05	4.70384e-05	0.745535	0.406758
Simvastatin	79902-63-9	C07262	C25H38O5	Diterpenoids	9.46181e-06	1.88525e-05	1.26906	0.105491
beta-Alanine	107-95-9	C00099	C3H7NO2	Alkaloids	0.000405571	0.000497928	1.09999	0.141613
7alpha-Hydroxypregnenolone	30626-96-1	C18038	C21H32O3	Prenol lipids	1.47076e-05	1.58648e-05	0.52252	0.854163
2'-Deoxyinosine-5'-monophosphate	3393-18-8	C06196	C10H13N4O7P	Nucleotide and its derivates	4.54054e-05	4.13874e-05	0.452457	0.683485
Ascorbic acid	50-81-7	C00072	C6H8O6	Vitamins	0.00229939	0.00016355	2.06235	0.0654883
3-Isopropylmalate	921-28-8	C04411	C7H12O5	Fatty Acyls	0.000538811	0.000659614	0.943744	0.450446
Ethyl cinnamate	103-36-6	C06359	C11H12O2	Phenylpropanoids	7.69027e-05	8.02638e-05	0.0982123	0.901756
Cinnamyl acetat	103-54-8	C12299	C11H12O2	Phenols	0.000386759	0.000364487	0.134078	0.842782
Serotonin	50-67-9	C00780	C10H12N2O	Tryptamine derivatives	0.00052021	0.000930546	0.190906	0.457624
Streptomycin	57-92-1	C00413	C21H39N7O12	Organooxygen compounds	5.35448e-05	8.93027e-05	0.595267	0.212732
D-Glutamine	5959-95-5	C00819	C5H10N2O3	Carboxylic acids and derivatives	0.049496	0.0593454	0.975588	0.312372
Dimethylbenzimidazole	582-60-5	C03114	C9H10N2	Benzimidazoles	0.000100798	5.82761e-05	0.973516	0.206867
Ketopantoic acid	470-30-4	C00966	C6H10O4		0.00138871	0.00192077	1.09819	0.207252
(S)-2-Aceto-2-hydroxybutanoate		C06006	C6H10O4	Keto acids and derivatives	0.00215141	0.00308101	1.37514	0.083729
Diallyl disulfide	2179-57-9	C08369	C6H10S2	Miscellaneous	0.00304933	0.00346428	0.657468	0.482751
Hordenine	539-15-1	C06199	C10H15NO	Alkaloids	7.2747e-05	7.6431e-05	0.0181639	0.883834
5-(3-Pyridyl)-2-hydroxytetrahydrofuran	53798-73-5	C19578	C9H11NO2	Pyridines and derivatives	2.79428e-05	3.80222e-05	0.971512	0.317759
Tacrolimus	104987-11-3	C01375	C44H69NO12	Alkaloids	8.78887e-05	0.000127759	1.06033	0.232834
Epicatechin;(+)-Epicatechin	490-46-0; 35323-91-2	C09727; C09728	C15H14O6	Flavonoids	8.13883e-05	8.90275e-05	0.47234	0.814909
L-Homoserine	1927-25-9; 672-15-1; 6027-21-0	C00263	C4H9NO3	Amino acid and derivatives	0.00356039	0.00404968	1.01809	0.210715
L-Homoglutamic acid	542-32-5; 1118-90-7	C00956	C6H11NO4	Amino acid and derivatives	0.000194128	0.000220012	0.347454	0.690958
3-Oxoadipic acid	689-31-6	C00846	C6H8O5	Keto acids and derivatives	9.84052e-05	7.66568e-05	1.48389	0.0907984
2'-Hydroxydihydrodaidzein; Butin	492-14-8	C03567; C09614	C15H12O5	Isoflavonoids; Flavonoids	7.70987e-05	9.87946e-05	0.904925	0.293178
alpha-Zearalenol; beta-Zearalenol	36455-72-8; 71030-11-0	C14750; C14751	C18H24O5	Macrolides and analogues	0.000604302	0.000473108	0.859348	0.348215
4-Hydroxyphenylacetaldehyde; 4'-Hydroxyacetophenone	7339-87-9; 99-93-4	C03765; C10700	C8H8O2	Benzene and substituted derivatives; Phenols	0.000165313	0.000149639	0.389675	0.583684
Eurycomalactone; Ingenol	23062-24-0; 30220-46-3	C08759; C09112	C19H24O6; C20H28O5	Diterpenoids	7.56223e-05	6.98945e-05	0.530878	0.786515
alpha-D-Glucose; D-Tagatose	492-62-6; 87-81-0	C00267; C00795	C6H12O6	Carbohydrates; Organooxygen compounds	0.00144674	0.00175444	1.11758	0.301058
(-)-Borneol; (+)-Borneol	464-45-9; 464-43-7	C01766; C01765	C10H18O	Monoterpenoids	0.000184983	0.000897328	1.11251	0.113034
Alpha-Terpineol; Patulin	10482-56-1; 149-29-1	C11393; C16748	C10H18O; C7H6O4	Monoterpenoids; Pyrans	0.00047513	0.00127472	1.74955	0.0203135
(+)-Afzelechin; (-)-Epiafzelechin	2545-00-8; 24808-04-6	C09320; C12128	C15H14O5	Flavonoids	0.000247745	0.000336017	1.14963	0.167187
Cedrelone; Isomangiferin	1254-85-9; 24699-16-9	C16979	C26H30O5; C19H18O11	Triterpenoids; Xanthones	8.11758e-05	4.01005e-05	1.17465	0.253624
1,2-Epoxy-p-menth-8-ene; Ortho-Hydroxyphenylacetic acid	1195-92-2; 614-75-5	C07271; C05852	C10H16O; C8H8O3	Oxepanes;Benzene and substituted derivatives	9.4373e-05	0.000114423	0.896054	0.478783
(-)-Fenchone	7787-20-4	C09859	C10H16O	Monoterpenoids	0.00153337	0.00164232	0.156621	0.796171
(2E)-Decenoyl-ACP; L-Pipecolic acid; Pipecolic acid	52-52-8; 3105-95-1	C03969; C00408	C6H11NO2	Carboxylic acids and derivatives; Amino acid and derivatives	0.00813319	0.0150846	0.0657139	0.348658
Cyanidin 3-rutinoside; Biorobin	28338-59-2; 17297-56-2	C08620	C27H30O15	Flavonoids	0.00132631	0.000566357	2.25366	0.00174464
Delphinidin-3-O-glucoside; Isoquercitrin	6906-38-3; 50986-17-9; 482-35-9	C12138	C21H20O12	Flavonoids	0.000177935	0.000136735	0.752625	0.338648
Amabiline; Supinine	17958-43-9; 551-58-6	C10263; C10403	C15H25NO4	Alkaloids	0.000757019	0.000548086	0.590117	0.361985
Phloretic acid; 3-(2-Hydroxyphenyl)-propanoic acid; Ethylparaben	501-97-3; 495-78-3; 120-47-8	C01744; C01198	C9H10O3	Phenols; Phenylpropanoic acids	0.00111763	0.00022679	1.09159	0.322495
trans-3-Hydroxycinnamic acid; p-Hydroxy-cinnamic acid; 1,5-Anhydro-D-glucitol	588-30-7;14755-02-3; 501-98-4; 7400-08-0; 154-58-5	C12621; C00811; C16538; C07326	C9H8O3; C6H12O5	Phenylpropanoids; Alcohols and polyols	2.4911e-05	5.03288e-05	1.1356	0.202389
Phenylacetic acid; 4-Methylbenzoic acid; M-toluic Acid	103-82-2; 99-94-5; 99-04-7	C07086; C01454; C07211	C8H8O2	Benzene and substituted derivatives	0.000224565	0.000276655	0.975945	0.457387
Alisol B; Macrocarpal B; Macrocarpal H	18649-93-9; 142698-60-0; 179388-53-5	C17460	C30H48O4; C28H40O6	Triterpenoids; Sesquiterpenoids	4.37097e-05	5.20879e-05	0.0117546	0.698143
Oleic acid; Vaccenic acid; Petroselinic acid	112-80-1; 693-72-1; 593-39-5	C00712; C08367; C08363	C18H34O2	Fatty Acyls	0.033171	0.026751	0.683527	0.374226
