# Supplementary material for: Rice cellulose synthase-like protein OsCSLD4 coordinates the trade-off between plant growth and defense
Source: Front Plant Sci. 2022 Sep 26;13:980424. doi: 10.3389/fpls.2022.980424 (PMC9548992; doi:10.3389/fpls.2022.980424)
Supplement: Supplementary Table 5 — Differential metabolites in WT and dnl19 mutant. [file Table_3.xlsx]

## Sheet: Sheet1
Supplementary Table 5. Differential metabolites in WT and dnl19 mutant.
Compound name	CAS	KEGG_ID	Formula	Class_EN	Mean WT	Mean dnl19	VIP	P-VALUE
Hyperoside	482-36-0	C10073	C21H20O12	Flavonoids	0.00187008	0.000831573	1.8009	0.00204715
Baicalin	21967-41-9	C10025	C21H18O11	Flavonoids	0.000175207	0.000110156	1.87824	0.0117096
Astragalin	480-10-4	C12249	C21H20O11	Flavonoids	0.0272016	0.00955714	2.36618	0.00628403
Homoorientin	4261-42-1	C01821	C21H20O11	Flavonoids	0.00360152	0.00143775	2.39991	0.000294682
Diosmin	520-27-4	C10039	C28H32O15	Flavonoids	0.00877147	0.00643144	1.9541	0.00922012
L-Valine	72-18-4	C00183	C5H11NO2	Amino acid and derivatives; amino acids	0.00613219	0.00818387	1.90307	0.0147571
L-Asparagine	70-47-3	C00152	C4H8N2O3	Amino acid and derivatives; amino acids	0.003075	0.00751209	2.21193	0.0218556
L-Aspartic acid	56-84-8	C00049	C4H7NO4	Amino acid and derivatives; amino acids	0.00965396	0.00780566	1.73986	0.0212928
L-Histidine	71-00-1	C00135	C6H9N3O2	Amino acid and derivatives; amino acids	0.00236906	0.00343783	1.68731	0.0345587
L-Alanine; DL-Alanine	56-41-7; 302-72-7	C00041; C01401	C3H7NO2	Amino acid and derivatives; Alkaloids; amino acids	0.00433568	0.00607375	1.67325	0.0261692
Malic acid	6915-15-7; 97-67-6	C00149	C4H6O5	Hydroxy acids and derivatives	0.00189292	0.00102364	2.22909	0.0111986
L(-)-Malic acid	636-61-3	C00497	C4H6O5	Fatty Acyls	0.00189292	0.00102364	2.22909	0.0111986
6-Phosphogluconic acid	53411-70-4	C00345	C6H13O10P	Organooxygen compounds	0.000107862	7.20414e-05	1.76207	0.0336017
D-Glucose 6-phosphate; Glucose 6-phosphate	56-73-5	C00092	C6H13O9P	Carbohydrates	0.0108274	0.00677739	2.36347	0.000431462
Galactose 1-phosphate	2255-14-3	C00446; C03384	C6H13O9P	Organooxygen compounds	0.0110844	0.00723291	2.47316	4.69892e-05
Gentisic acid	490-79-9	C00628	C7H6O4	Phenols	6.55312e-05	0.000162435	1.93412	0.00276554
Gluconic acid	526-95-4	C00257	C6H12O7	Carbohydrates	0.00388981	0.00294434	1.90385	0.0107798
Luteolin	491-70-3	C01514	C15H10O6	Flavonoids	0.000145531	7.61805e-05	1.84621	0.0408807
5-Hydroxymethylfurfural	67-47-0	C11101	C6H6O3	Carbonyl compounds	0.000286296	0.000188457	2.12319	0.00476709
S-(5'-Adenosy)-L-homocysteine	979-92-0	C00021	C14H20N6O5S	Amino acid and derivatives	0.000136559	6.41426e-05	1.47347	0.0204152
3-Ethyl-1,2-benzenediol	933-99-3	C06728	C8H10O2	Phenols	0.00221143	0.0036235	1.50585	0.0368645
4-Isopropylbenzoic acid	536-66-3	C06578	C10H12O2	Prenol lipids	9.23511e-05	5.60419e-05	1.63546	0.0334603
3-Octyl alcohol	589-98-0	C17144	C8H18O	Miscellaneous	0.00012507	0.000195226	1.77907	0.0270897
N5-(L-1-Carboxyethyl)-L-ornithine	104537-93-1	C04210	C8H16N2O4	Amino acid related compounds	6.69938e-05	0.000114449	1.5263	0.0472959
Mellein	480-33-1		C10H10O3	Coumarins	6.84541e-05	3.76693e-05	1.8874	0.0136366
3',4',7-Trihydroxyisoflavone	485-63-2	C14313	C15H10O5	Flavonoids	7.61212e-05	3.2595e-05	2.15301	0.01238
Norwogonin	4443-09-8	C10113	C15H10O5	Flavonoids	0.000130816	0.000340994	2.31339	0.00309975
2-Carboxybenzaldehyde	119-67-5	C03057	C8H6O3	Phenols	5.72412e-05	9.805e-05	1.83851	0.0219638
20-HETE	79551-86-3	C14748	C20H32O3	Fatty Acyls	0.000177811	0.000115408	1.61819	0.0375239
Anisatin	5230-87-5	C09294	C15H20O8	Sesquiterpenoids	0.000872451	0.000321459	2.47145	0.00152145
Tricin	520-32-1	C10193	C17H14O7	Flavonoids	0.00150872	0.000905004	2.10493	0.00855058
Rosmarinic acid	537-15-5; 20283-92-5	C01850	C18H16O8	Phenylpropanoids	8.36231e-05	3.4906e-05	1.68891	0.0472238
3-Ethylphenol	620-17-7	C14386	C8H10O	Phenols	0.00100321	0.000555305	2.05923	0.00980553
1-Kestose	470-69-9	C03661	C18H32O16	Organooxygen compounds	0.000385961	0.000178639	1.84489	0.0327168
Cascaroside A	53823-08-8	C10307	C27H32O14	Anthraquinones	0.00177894	0.00129605	1.69427	0.0385578
Glucoliquiritin	93446-18-5		C27H32O14	Flavonoids	0.00177894	0.00129605	1.69427	0.0385578
4-O-alpha-D-Galactopyranuronosyl-D-galacturonic acid	5894-59-7	C02273	C12H18O13	Organooxygen compounds	0.000321336	0.000144384	2.15866	0.000745387
Glycerophosphocholine	28319-77-9	C00670	C8H20NO6P	Cholines	4.14353e-05	1.82762e-05	1.9165	0.0370911
vitamin K2	11032-49-8		C41H56O2	Vitamins	0.000596026	0.000342637	2.12075	0.00383422
(+)-Glaucarubinone	1259-86-5	C08763	C25H34O10	Diterpenoids	8.14079e-05	0.000183037	1.64893	0.0475864
Pseudobaptigenin	90-29-9	C10522	C16H10O5	Isoflavonoids	2.85412e-05	6.66616e-05	1.74611	0.0318281
Miltirone	27210-57-7	C13715	C19H22O2	Diterpenoids	0.0336057	0.0168663	1.43381	0.025035
4-Guanidinobutyric acid	463-00-3	C01035	C5H11N3O2	Organic acids	0.00303142	0.00469886	1.60706	0.0298749
Encecalin	20628-09-5	C09005	C14H16O3	Phenols	0.000580395	0.000514162	1.69192	0.0359617
p-Cresol	106-44-5	C01468	C7H8O	Phenols	0.000190657	0.000128261	1.80423	0.0267396
D-Aspartic acid	1783-96-6	C00402	C4H7NO4	Alkaloids	0.00965396	0.00780566	1.73986	0.0212928
Agrocybenine	178764-92-6		C12H18N2O	Alkaloids	4.71632e-05	9.90926e-05	1.6604	0.0226446
alpha-Irone	79-69-6; 35124-13-1	C09690	C14H22O	Prenol lipids	0.00344029	0.00242046	1.65831	0.0269621
Cassythicine	5890-28-8	C09389	C19H19NO4	Alkaloids	3.07876e-05	6.70157e-05	2.42162	8.37698e-05
L-Pipecolic acid	535-75-1; 3105-95-1	C00408	C6H11NO2	Amino acid and derivatives	0.0213229	0.0323425	1.60658	0.0415296
Pyrrolidonecarboxylic acid	4042-36-8	C02237	C5H7NO3	Carboxylic acids and derivatives	0.0213229	0.0323425	1.60658	0.0415296
Loganin	18524-94-2	C01433	C17H26O10	Terpene	0.000202452	0.000106127	1.87506	0.0162898
C-Veratroylglycol	168293-10-5		C10H12O5	Phenylpropanoids	5.63501e-05	9.26203e-05	1.98758	0.014956
Swertiajaponin	6980-25-2	C10187	C22H22O11	Flavonoids	2.56666e-05	1.37336e-05	1.62688	0.0382565
Peonidin-3-glucoside	68795-37-9	C12141	C22H22O11	Flavonoids	0.0438809	0.0278101	1.93623	0.0108073
Isorhamnetin-3-O-neohespeidoside	55033-90-4		C28H32O16	Flavonoids	0.000382177	0.000192928	2.09398	0.00391568
Stigmasterol	83-48-7	C05442	C29H48O	Steroids and steroid derivatives	0.000131654	0.000410191	1.91299	0.00849637
3-Butylidenephthalide	551-08-6	C16924	C12H12O2	Miscellaneous	6.37822e-05	3.4407e-05	1.78348	0.0283579
Beta-D-Fructose 2-phosphate	19046-69-6	C03267	C6H13O9P	Organooxygen compounds	0.0160512	0.0122952	1.95805	0.00891595
3,9-Dihydroxypterocarpan	61135-91-9	C04271	C15H12O4	Flavonoids	0.000534752	0.00042161	1.73346	0.0293354
2,6-Dimethylaniline	87-62-7	C11004	C8H11N	Benzene and substituted derivatives	0.000112439	0.000180525	1.72546	0.0376872
Paeoniflorin	23180-57-6	C09959	C23H28O11	Monoterpenoids	4.5252e-05	9.13622e-05	1.64775	0.0245988
Podophyllotoxinone	477-49-6	C10875	C22H20O8	Lignans	0.000310697	9.3391e-05	2.30732	0.0237833
Pyridoxine	65-23-6	C00314	C8H11NO3	Vitamins	0.000108379	0.000199805	1.67854	0.0476653
Adrenosterone	382-45-6	C05285	C19H24O3	Steroids and steroid derivatives	3.11574e-05	4.23108e-05	1.67924	0.0456385
Farrerol	24211-30-1	C09734	C17H16O5	Flavonoids	0.000117619	0.000225969	1.82634	0.0456683
Pyridoxamine 5'-phosphate	529-96-4	C00647	C8H13N2O5P	Pyridines and derivatives	1.5814e-05	3.67035e-05	1.99249	0.00699122
Alpha-Terpineol; Patulin	10482-56-1; 149-29-1	C11393; C16748	C10H18O; C7H6O4	Monoterpenoids; Pyrans	0.00047513	0.00127472	1.74955	0.0203135
Cyanidin 3-rutinoside; Biorobin	28338-59-2; 17297-56-2	C08620	C27H30O15	Flavonoids	0.00132631	0.000566357	2.25366	0.00174464
